# 1 **R-loop homeostasis and cancer mutagenesis promoted by** 2 **the DNA cytosine deaminase APOBEC3B**

3  
4  
5 Jennifer L. McCann<sup>1-4,#</sup>, Agnese Cristini<sup>5,#</sup>, Emily K. Law<sup>1-4,##</sup>, Seo Yun Lee<sup>6,##</sup>, Michael  
6 Tellier<sup>5</sup>, Michael A. Carpenter<sup>1-4</sup>, Chiara Beghè<sup>5</sup>, Jae Jin Kim<sup>6</sup>, Matthew C. Jarvis<sup>2-4</sup>,  
7 Bojana Stefanovska<sup>2-4</sup>, Nuri A. Temiz<sup>2,7</sup>, Erik N. Bergstrom<sup>8-10</sup>, Daniel J. Salamango<sup>2-4</sup>,  
8 Margaret R. Brown<sup>2-4</sup>, Shona Murphy<sup>5</sup>, Ludmil B. Alexandrov<sup>8-10</sup>, Kyle M. Miller<sup>6,11</sup>,  
9 Natalia Gromak<sup>5,\*</sup> & Reuben S. Harris<sup>1-4,\*</sup>

10  
11 <sup>1</sup> Howard Hughes Medical Institute, University of Minnesota, Minneapolis, Minnesota,  
12 USA, 55455

13 <sup>2</sup> Masonic Cancer Center, University of Minnesota, Minneapolis, Minnesota, USA,  
14 55455

15 <sup>3</sup> Institute for Molecular Virology, University of Minnesota, Minneapolis, Minnesota, USA,  
16 55455

17 <sup>4</sup> Department of Biochemistry, Molecular Biology and Biophysics, University of  
18 Minnesota, Minneapolis, Minnesota, USA, 55455

19 <sup>5</sup> Sir William Dunn School of Pathology, University of Oxford, South Parks Road, Oxford,  
20 UK, OX1 3RE

21 <sup>6</sup> Department of Molecular Biosciences, University of Texas at Austin, Austin, Texas,  
22 USA, 78712

23 <sup>7</sup> Institute for Health Informatics, University of Minnesota, Minneapolis, MN, USA, 55455

24 <sup>8</sup> Department of Cellular and Molecular Medicine, UC San Diego, La Jolla, California,  
25 USA, 92093

26 <sup>9</sup> Department of Bioengineering, UC San Diego, La Jolla, California, USA, 92093

27 <sup>10</sup> Moores Cancer Center, UC San Diego, La Jolla, CA, 92037, USA

28 <sup>11</sup> Livestrong Cancer Institutes, Dell Medical School, University of Texas at Austin,  
29 Austin, Texas, USA, 78712

30 # Equal primary contributions; ## Equal secondary contributions

31 \* Correspondence: [natalia.gromak@path.ox.ac.uk](mailto:natalia.gromak@path.ox.ac.uk) and [rsh@umn.edu](mailto:rsh@umn.edu)

32  
33 Running Title: APOBEC3B in R-loop biology and mutagenesis

34  
35 Manuscript Information: Abstract 149 words; Article including Refs & Legends 60,000  
36 characters; Figs. 1-8; Supplementary Information: Methods; Tables S1-2; Figs. S1-6

## 37 **Abstract**

38 The single-stranded DNA cytosine-to-uracil deaminase APOBEC3B is an antiviral  
39 protein implicated in cancer. However, its substrates in cells are not fully delineated.  
40 Here, APOBEC3B proteomics reveal interactions with a surprising number of R-loop  
41 factors. Biochemical experiments show APOBEC3B binding to R-loops in human cells  
42 and *in vitro*. Genetic experiments demonstrate R-loop increases in cells lacking  
43 APOBEC3B and decreases in cells overexpressing APOBEC3B. Genome-wide  
44 analyses show major changes in the overall landscape of physiological and stimulus-  
45 induced R-loops with thousands of differentially altered regions as well as binding of  
46 APOBEC3B to many of these sites. APOBEC3 mutagenesis impacts overexpressed  
47 genes and splice factor mutant tumors preferentially, and APOBEC3-attributed *kataegis*  
48 are enriched in RTCW consistent with APOBEC3B deamination. Taken together with  
49 the fact that APOBEC3B binds single-stranded DNA and RNA and preferentially  
50 deaminates DNA, these results support a mechanism in which APOBEC3B mediates R-  
51 loop homeostasis and contributes to R-loop mutagenesis in cancer.

52

## 53 **Key words**

54 APOBEC mutation signature; APOBEC3B; Cancer mutagenesis; DNA damage; DNA  
55 deamination; *Kataegis*; R-loop homeostasis; R-loop mutagenesis; RNA/DNA hybrids

56

## 57 **Highlights**

58 \* Unbiased proteomics link antiviral APOBEC3B to R-loop regulation

59 \* Systematic alterations of APOBEC3B levels trigger corresponding changes in R-loops

60 \* APOBEC3B binds R-loops in living cells and *in vitro*

61 \* Bioinformatics analyses support an R-loop deamination and mutation model

62

## 63 **Introduction**

64 The APOBEC3 family of single-stranded (ss)DNA cytosine deaminases are critical  
65 players in the overall innate immune response to viral infection (reviewed by refs.<sup>1,2</sup>).  
66 Popularized initially by potent HIV-1 restriction activity<sup>3-6</sup>, the seven human APOBEC3  
67 enzymes collectively elicit activity against a broad number of DNA-based viruses  
68 including retroviruses (HIV-1, HTLV-1), hepadnaviruses (HBV), papillomaviruses (HPV),  
69 parvoviruses (AAV), polyomaviruses (JC and BKPyV), and herpesviruses (EBV, HSV-1)  
70 (reviewed by refs.<sup>1,2</sup>). An important biochemical feature of this family of enzymes is an  
71 intrinsic preference for different nucleobases immediately 5' of target cytosines<sup>7-11</sup>. For  
72 example, APOBEC3B (A3B) and APOBEC3A (A3A) preferentially deaminate cytosines  
73 in 5'TC motifs and the related antibody gene diversification enzyme AID targets 5'AC  
74 and 5'GC motifs.

75 In addition to beneficial functions in innate and adaptive immunity, multiple DNA  
76 cytosine deaminases have detrimental roles in cancer mutagenesis (reviewed by  
77 refs.<sup>1,12-17</sup>). Misprocessing of AID-catalyzed deamination events in antibody gene  
78 variable and switch regions can result in DNA breaks and chromosomal translocations  
79 in B cell malignancies (reviewed by ref.<sup>17</sup>). Off-target deamination of other genes also  
80 occurs at lower frequencies and the resulting mutations may contribute to B cell lineage-  
81 derived leukemias and lymphomas<sup>18,19</sup>. In comparison, large-scale tumor sequencing  
82 projects have reported an APOBEC mutation signature in a wide variety of cancer types

83 including those derived from breast, lung, head/neck, cervix, and bladder tissues (see  
84 recent pan-cancer analysis<sup>20</sup> and reviews above). In cancer, the APOBEC mutation  
85 signature is defined as C-to-T transitions and C-to-G transversions in 5'TCA and 5'TCT  
86 motifs to help distinguish from other mutational processes<sup>21-25</sup>. Recent estimates  
87 indicate that APOBEC enzymes are the second most prevalent mutation-generating  
88 process in human cancer following clock-like mutagenesis which is attributed to  
89 ageing<sup>20</sup>.

90         Despite extensive documentation of the APOBEC mutation signature in cancer,  
91 the precise molecular mechanisms governing this mutational process are still unclear.  
92 One challenge is the possibility that at least two enzymes, A3B and A3A, combine in  
93 different ways to generate the overall signature (*e.g.*, refs.<sup>21-23,26-28</sup>). However, a few  
94 mechanistic insights have still been inferred from the physical characteristics of  
95 genomes with, for instance, APOBEC mutations associating with chromosomal DNA  
96 replication and specifically with C-to-U deamination events in the lagging strand  
97 template<sup>29-34</sup>. Other genomic features and processes with exposed ssDNA may be  
98 similarly prone to APOBEC mutagenesis such as single-stranded loop regions of DNA  
99 hairpins<sup>35,36</sup> and ssDNA tracts in recombination and repair reactions, which sometimes  
100 manifest clusters of strand-coordinated APOBEC3-attributed mutations (*aka. kataegis*;  
101 *e.g.*, refs.<sup>25,35,37</sup>). Together, these studies have indicated a passive diffusion mechanism  
102 in which simple expression of A3B and/or A3A leads to random encounters with any  
103 exposed ssDNA followed in some instances by processive local deamination.

104         Another potential substrate for APOBEC enzymes is ssDNA exposed by R-loop  
105 formation. R-loops occur when nascent RNA re-anneals to the transcribed DNA strand,



106 creating a three-stranded structure containing an RNA/DNA hybrid and a displaced non-  
107 transcribed ssDNA strand (reviewed by refs.<sup>38-40</sup>). R-loops are critical for the specialized  
108 mechanism of AID-catalyzed antibody gene hypermutation and class switch  
109 recombination in B lymphocytes (reviewed by refs.<sup>41,42</sup>). R-loops also represent a  
110 prominent source of genome instability associated with human disease, including  
111 cancer (e.g., refs.<sup>43-45</sup>; reviewed by refs.<sup>39,40,46-51</sup>). However, evidence linking APOBEC  
112 enzymes to R-loop-associated mutation and genome instability is presently lacking. A  
113 potential clue came from recent studies showing a mismatch repair-dependent synthetic  
114 lethal interaction between A3B activity and uracil excision repair disruption<sup>52</sup>. This report  
115 suggested that the toxic lesions may represent U/G mispairs, which are unlikely to arise  
116 through replication but may be created by transcription-associated processes, such as  
117 C-to-U deamination within a R-loop.

118 A3B is strongly implicated in cancer mutagenesis based on several criteria  
119 including nuclear localization, overexpression in tumors, upregulation by cancer-causing  
120 viruses such as HPV, and associations with clinical outcomes (reviewed by refs.<sup>1,12-14</sup>).  
121 To gain deeper insights into the pathological role of A3B in cancer mutagenesis, an  
122 unbiased affinity purification and mass spectrometry (AP-MS) approach was used to  
123 identify A3B-interacting proteins. Two dozen proteins were recovered in biologically-  
124 independent experiments, and 60% of the resulting high-confidence interactors had  
125 been reported previously as R-loop-associated factors in RNA/DNA hybrid AP-MS  
126 experiments<sup>53</sup>. A comprehensive series of genetic, cell biology, biochemistry, genomic,  
127 and bioinformatic studies was therefore undertaken to investigate the relationship  
128 between A3B and R-loops. Surprisingly, the results indicated that A3B functions in R-

129 loop homeostasis. Moreover, R-loop regions impacted by cellular A3B show significant  
130 enrichments for APOBEC3 signature mutations including *kataegis* in breast tumors.  
131 Altogether, these results reveal an unanticipated role for A3B in R-loop biology and a  
132 distinct mechanism of transcription-associated cancer mutagenesis.

133

## 134 **Results**

135

### 136 **APOBEC3B interacts with R-loops and R-loop-associated proteins**

137 Little is known about the molecular processes that serve to regulate the mutagenic  
138 activities of A3B. To address this gap in knowledge, a functional A3B-2xStrep-3xFlag  
139 construct (hereafter A3B-SF) was expressed in 293T cells, anti-Strep affinity-purified,  
140 and subjected to mass spectrometry to identify interacting proteins (AP-MS workflow  
141 schematic in **Fig. S1a**). This procedure included exogenous RNase A and high salt  
142 concentrations to enrich for direct and strong interactions, respectively. Immunoblots,  
143 Coomassie gels, and DNA deaminase activity assays were used to validate the  
144 presence, enrichment, and activity of affinity-purified A3B (**Fig. S1b-d**). Expression of  
145 an eGFP-SF construct and an empty 2xStrep-3xFlag vector was analyzed in parallel as  
146 negative controls.

147 Six independent AP-MS experiments yielded a total of 24 specific A3B-  
148 interacting proteins (**Table S1**; independent confirmation in **Fig. S1e-f**). These proteins  
149 were abundant in all 6 A3B-SF data sets and, importantly, absent in GFP-SF or empty  
150 vector datasets. Only CDK4, which regulates A3B localization during the cell cycle<sup>54</sup>,  
151 and hnRNPUL1, which tethered to Cas9 is capable of targeting A3B for base editing<sup>55</sup>,

152 had been reported previously. However, literature analyses revealed that 60% of these  
153 A3B interactors had been found independently in S9.6 AP-MS experiments<sup>53</sup> (**Fig. 1a-**  
154 **b**). As the S9.6 mAb binds strongly to RNA/DNA hybrid structures<sup>56,57</sup>, this significant  
155 interactome overlap suggested that A3B may also interact with R-loops. To test this  
156 hypothesis, interactions between A3B and multiple R-loop factors were confirmed in co-  
157 immunoprecipitation (co-IP) experiments. For example, doxycycline (Dox)-inducible  
158 A3B-eGFP was immunoprecipitated from MCF10A cells with an anti-eGFP antibody and  
159 the R-loop-associated protein hnRNPUL1 was detected by immunoblotting (system  
160 validation in **Fig. 1c** and representative co-IP in **Fig. 1d**). Parallel slot blots showed that  
161 R-loops also co-purified with A3B-eGFP, and the RNase H sensitivity of the signal  
162 demonstrated the specific detection of RNA/DNA hybrids (**Fig. 1d**).

163 The S9.6 mAb was then used to IP RNA/DNA hybrids from MCF10A cells treated  
164 with phorbol 12-myristate 13-acetate (PMA) to induce endogenous *A3B* expression<sup>58</sup>.  
165 Immunoblotting confirmed enrichment of an established R-loop interacting protein,  
166 TOP1<sup>59,60</sup>, and a shared R-loop and A3B interactor, hnRNPUL1, in all S9.6 IP reactions  
167 except those saturated with a synthetic RNA/DNA hybrid competitor (**Fig. 1e**). The non-  
168 R-loop-interacting protein Lamin B1 served as a negative control for these IP reactions.  
169 Endogenous A3B copurified with R-loop structures in basal non-induced conditions and  
170 this interaction increased following PMA treatment (**Fig. 1e**). Importantly, no A3B signal  
171 was detected in S9.6 pull downs from *A3B*-null MCF10A cells, which demonstrated  
172 interaction specificity (**Fig. 1e**; *A3B* knockout construction and validation in **Fig. S2a-d**).

173

174 **Elevated nuclear R-loop levels in *A3B*-null and *A3B*-depleted cells**

175 To investigate a potential role for A3B in R-loop biology, R-loop levels were quantified in  
176 MCF10A and its *A3B*-null derivative. First, nucleoplasmic S9.6 staining intensity was  
177 measured by immunofluorescence (IF) confocal microscopy. These experiments  
178 revealed a strong increase in nucleoplasmic S9.6 fluorescence in *A3B*-null cells in  
179 comparison to parental MCF10A cells (**Fig. 2a-b**). Second, S9.6 dot blot experiments  
180 confirmed elevated R-loop levels in the *A3B*-null MCF10A cells in comparison to the  
181 parental line (**Fig. 2c-d**). Importantly, in both series of experiments, RNase H treatment  
182 eliminated the increase in R-loop signals observed in the absence of endogenous A3B.  
183 S9.6 signal detecting nucleolar rRNA is mostly insensitive to RNase H treatment, as  
184 reported<sup>61</sup>, and is also largely unaffected by A3B.

185 To address whether the relationship between A3B and R-loop levels may be a  
186 general mechanism, analogous S9.6 IF microscopy and dot blot experiments were done  
187 using U2OS cells, which express high levels of endogenous A3B<sup>54,62,63</sup>. U2OS cells  
188 were transduced with a validated shRNA to stably deplete endogenous *A3B* or a non-  
189 targeting control shRNA<sup>22,64</sup> (*A3B* knockdown validation in **Fig. S2e-g**). In these  
190 experiments, *A3B* knockdown caused a strong increase in nucleoplasmic S9.6 staining  
191 intensity by IF microscopy in comparison to control transduced cells analyzed in parallel  
192 (**Fig. 2e-f**). As above, nearly all nucleoplasmic S9.6 staining was ablated by RNase H  
193 treatment, indicating that the signal is specific to RNA/DNA hybrids. An increase in  
194 RNA/DNA hybrid signal was also obtained in S9.6 dot blot experiments from *A3B*-  
195 depleted versus control transduced cells and, again, specificity was confirmed by  
196 RNase H treatment (**Fig. 2g-h**). R-loop imbalances are a known source of DNA  
197 damage<sup>38-40</sup>, and elevated R-loop levels in *A3B*-null MCF10A and *A3B*-depleted U2OS

198 cells triggered concomitant increases in DNA break formation as evidenced by  $\gamma$ -H2AX  
199 staining (**Fig. 2i-l**). However, it is important to note that these elevated levels of R-loops  
200 and DNA damage did not alter overall rates of DNA replication (EdU incorporation) or  
201 cell cycle progression (**Fig. S2h-k**).

202

### 203 **A3B reduces nuclear R-loop levels through a deamination-dependent mechanism**

204 Given results above showing increased R-loop accumulation upon *A3B* loss, we next  
205 asked whether A3B overexpression might have the opposite effect and suppress R-loop  
206 formation. U2OS cells were transfected with an expression vector for A3B-eGFP or  
207 eGFP as a negative control, incubated 24 hrs to allow for protein expression, treated 4  
208 hrs with the Bromodomain and Extra-Terminal (BET) protein family inhibitor JQ1 to  
209 enhance R-loop formation<sup>44,65,66</sup>, and then analyzed by IF confocal microscopy for S9.6  
210 staining. In comparison to the eGFP control, A3B-eGFP expression caused a significant  
211 decrease in the average intensity of nucleoplasmic S9.6 levels (**Fig. 3a-b**). Interestingly,  
212 expression of A3A, which is more active than A3B in ssDNA deamination assays<sup>67,68</sup>,  
213 had no effect suggesting a specific R-loop role for A3B (**Fig. 3a-b**).

214 The hallmark biochemical activity of A3B is ssDNA C-to-U deamination (e.g.,  
215 refs.<sup>22,67,68</sup>; reviewed by refs.<sup>13,69,70</sup>). To determine whether deaminase activity is  
216 required for reducing nuclear R-loop levels, U2OS cells were transfected with constructs  
217 expressing A3B-eGFP or a single amino acid substitution catalytic mutant E255A, which  
218 prevents A3B from deprotonating water and creating the hydroxide ion required for C-to-  
219 U deamination (reviewed by refs.<sup>13,69,70</sup>). Importantly, wild-type A3B caused a significant  
220 reduction in nucleoplasmic R-loop levels as quantified by S9.6 staining and IF

221 microscopy, whereas the catalytic mutant had a less pronounced effect despite similar  
222 expression levels (**Fig. 3c-d** and data not shown). However, because U2OS cells  
223 already express high levels of endogenous A3B (above) and APOBEC3 enzymes  
224 including A3B are reported to oligomerize<sup>68,71-75</sup>, this intermediate phenotype may be  
225 due to oligomerization between overexpressed mutant and endogenous A3B.

226 Therefore, a series of genetic complementation experiments was performed to  
227 compare the activities of wild-type A3B and the E255A catalytic mutant in cells lacking  
228 endogenous A3B. First, endogenous *A3B* was depleted from U2OS cells as above,  
229 which resulted in lower A3B protein and activity levels (**Fig. 3e**). Second, *A3B*-depleted  
230 U2OS cells were stably transfected with shRNA-resistant constructs expressing HA-  
231 tagged wild-type A3B, A3B-E255A, or an empty vector control (**Fig. 3e**). The wild-type  
232 A3B enzyme but not the E255A catalytic mutant restored ssDNA deaminase activity as  
233 expected (**Fig. 3e**). Third, R-loop levels were analyzed by S9.6 dot blot assays.  
234 Importantly, complementation with wild-type A3B rescued the effect of *A3B* depletion  
235 and caused a significant reduction in R-loops (**Fig. 3f-g**). In contrast, cells  
236 complemented with similar levels of the catalytic mutant protein, A3B-E255A, showed  
237 no significant change in R-loop levels demonstrating a deamination-dependent  
238 mechanism.

239

#### 240 **APOBEC3B-regulated R-loops are transcription-dependent**

241 R-loop formation normally occurs during the process of transcription when a nascent  
242 RNA hybridizes with the template DNA strand and displaces the non-template ssDNA  
243 behind the elongating RNA polymerase (reviewed by refs.<sup>38,39,76</sup>). To confirm that A3B-

244 associated R-loops are transcription-dependent, shCtrl and shA3B U2OS cells were  
245 treated with the global transcription inhibitor triptolide<sup>77,78</sup> and IF microscopy analyses  
246 were used to quantify R-loop levels. As above, A3B depletion resulted in an increase in  
247 nucleoplasmic R-loop levels, and triptolide abolished this effect (**Fig. 4a-b**). Dot blot  
248 analysis of RNA/DNA hybrids yielded similar results (**Fig. 4c-d**). Complementary data  
249 were obtained using a different transcription inhibitor, flavopiridol, which specifically  
250 inhibits the CDK9 kinase subunit of the positive transcription elongation factor b (P-  
251 TEFb) of RNA polymerase II (*i.e.*, flavopiridol inhibits CDK9, blocks transcription  
252 elongation, and concomitantly blocks R-loop accumulation<sup>79</sup>) (**Fig. 4c-d**). These results  
253 confirmed that A3B-targeted R-loops are indeed transcription-dependent.

254

### 255 **APOBEC3B alters the genome-wide distribution of R-loops**

256 The aforementioned IF confocal microscopy and dot blot results suggested a role for  
257 A3B in regulating R-loop levels genome-wide. This possibility was investigated using  
258 DNA/RNA hybrid IP (DRIP)-seq experiments. In line with previous studies<sup>79-81</sup>, DRIP-  
259 seq peaks in wild-type (WT) and A3B knockout (KO) MCF10A cells were mainly  
260 intragenic and distributed between protein-coding, long non-coding RNA, and enhancer  
261 RNA genes (**Fig. 5a-b**). As anticipated by these distributions and the transcription  
262 dependence above, the vast majority of DRIP-seq positive regions in WT and KO  
263 MCF10A cells occurred in expressed genes (**Fig. S3a**).

264 A global comparison of DRIP-seq peaks between KO and WT MCF10A revealed  
265 changes in the overall R-loop landscape with 8,296 peaks 'increased', 13,761 peaks  
266 'decreased', and 154,036 peaks 'unchanged' (red vs blue traces in **Fig. 5c-e**).

267 Representative individual gene results are shown for *GADD45A* and *PHLDA1*,  
268 *HIST1H1B* and *SYT8*, and *HIST1H1E* and *DDX1*, which show increased, decreased,  
269 and unchanged R-loop levels, respectively, in KO cells in comparison to WT cells (**Fig.**  
270 **5f, h, j**). These DRIP-seq results were confirmed by gene-specific DRIP-qPCR (**Fig. 5g,**  
271 **i, k**). As above, DRIP-qPCR signals were reduced significantly by RNase H treatment,  
272 further confirming R-loop specificity (**Fig. 5g, i, k, striped bars**). Differential DRIP signals  
273 were not due to transcription differences between the KO and WT cell lines (**Fig. S3b**).  
274 As expected, negligible DRIP signals were found in non-expressed genes and  
275 intergenic loci (e.g., *TFF1* in **Fig. S3c-d**). In addition, similar DRIP results were obtained  
276 in a different cell line (*A3B*-depleted HeLa) analyzed by immunoblotting and qPCR (**Fig.**  
277 **S3e-g**).

278

### 279 **APOBEC3B accelerates the kinetics of R-loop resolution**

280 Transcriptional activation by different signal transduction pathways is known to trigger  
281 large increases in R-loop formation<sup>82,83</sup>. As the datasets above were generated under  
282 normal growth conditions, an additional set of experiments was done to address  
283 whether *A3B* may also affect signal transduction-induced R-loops. Therefore, WT and  
284 KO MCF10A lines were treated with PMA to induce the protein kinase C (PKC) and  
285 non-canonical (nc)NF- $\kappa$ B signal transduction pathways and, as such, activate the  
286 transcription of many genes including endogenous *A3B*<sup>58,84</sup>.

287 First, global R-loop distributions were analyzed by DRIP-seq in WT MCF10A  
288 following 2 hrs PMA treatment in comparison to a DMSO control treatment (workflow in  
289 **Fig. S4a**). As anticipated, PMA caused changes in the overall R-loop landscape with



290 13,422 peaks increased, 16,432 peaks decreased, and 171,322 unchanged (**Fig. S4b-**  
291 **d**). Many genes such as *JUNB* and *FOS* were induced strongly by PMA treatment and  
292 showed significant increases in DRIP signals (**Fig. S4e-f**). Other genes such as *NAXE*  
293 and *ARL4D* showed decreases in DRIP signals (**Fig. S4g-h**), whereas the majority such  
294 as *GAPDH* and *GEMIN7* showed no changes in R-loop formation (**Fig. S4i-j**).

295 Second, a parallel set of ChIP-seq experiments was done in MCF10A with Dox-  
296 inducible A3B-eGFP (**Fig. 1c**) to assess whether any of these R-loop categories might  
297 be bound by this deaminase (workflow in **Fig. S4a**). An epitope-tagged protein was  
298 necessary because ChIP-grade antibodies have yet to be developed for endogenous  
299 A3B. Interestingly, A3B-eGFP appeared to bind preferentially to genomic DNA regions  
300 coincident with DRIP-seq peaks increased in PMA-treated cells in comparison to vehicle  
301 control treated cells (ChIP-seq results superimposed over DRIP-seq results in **Fig.**  
302 **S4b**). In contrast, A3B-eGFP ChIP-seq peaks were mainly unperturbed in genomic DNA  
303 regions in which R-loop levels decreased or remained unchanged upon PMA treatment  
304 (**Fig. S4c-d**). Representative results were confirmed independently by ChIP-qPCR (**Fig.**  
305 **S4k**). Moreover, quantification indicated that 43% of A3B ChIP peaks overlap with R-  
306 loops peaks induced by PMA ( $P = 0.0001$ , two-tailed binomial test; 54% overlap for  
307 ChIP peaks with >5-fold enrichment compared to uninduced Dox<sup>-</sup> condition,  $P =$   
308 0.0008). These results combined to indicate that A3B binds preferentially to genomic  
309 DNA regions with evidence for R-loop accumulation.

310 Third, the PMA-inducibility of this system enabled an assessment of the kinetics  
311 of R-loop resolution in the presence and absence of A3B. WT and KO cells were treated  
312 with PMA or DMSO for 2 and 6 hrs and then analyzed by DRIP-seq (workflow in **Fig.**

313 **6a**). These timepoints were chosen for analysis because transcription induction and R-  
314 loop formation are rapid (2 hrs data above) and A3B protein levels are upregulated  
315 maximally by 6 hrs post-PMA treatment<sup>58</sup> (**Fig. 6b-c**). For example, *JUNB* and *DUSP1*  
316 have R-loop peaks that are strongly induced by PMA at 2 hrs and these return to near-  
317 control levels by 6 hrs (**Fig. 6d**). In contrast, R-loop peaks in the same genes remained  
318 significantly elevated and/or showed delayed resolution kinetics in KO cells after 6 hrs  
319 PMA treatment (**Fig. 6d**). PMA non-responsive genes used as controls did not show R-  
320 loop induction or major differences in R-loop levels after 6 hrs PMA treatment (e.g.,  
321 *GAPDH* and *HSPA8* in **Fig. 6e**). Moreover, independent IF confocal microscopy studies  
322 of the kinetics of R-loop resolution following PMA treatment of WT MCF10A cells  
323 showed that nucleoplasmic R-loop levels peak at 2 hrs and decline substantially by 6  
324 hrs, whereas no decline (even a modest increase) was observed in A3B KO cells (**Fig.**  
325 **6f-g**). As above, all DRIP-qPCR and nucleoplasmic R-loop signals were sensitive to  
326 RNase H treatment indicating specificity (**Fig. 6d-g**). Taken together with the ChIP data  
327 above, the results of these PMA time course experiments indicated that nuclear A3B is  
328 recruited to PMA-induced R-loops and contributes to their timely resolution.

329

### 330 **APOBEC3B biochemical activities required for R-loop resolution**

331 To investigate the biochemical activities of A3B in R-loop resolution, wild-type A3B was  
332 purified from 293T cells (**Fig. S5a**) and used for nucleic acid binding and DNA  
333 deamination experiments (**Fig. 7** and **Fig. S5b-c**). The various nucleic acids used in  
334 these biochemical experiments are depicted in **Fig. 7a**. EMSAs indicated that A3B is  
335 capable of binding to R-loop structures (novel), to ssDNA and ssRNA (expected<sup>67,68,85</sup>),

336 and to lesser extents to dsDNA, dsRNA, or RNA/DNA hybrid (also expected<sup>67,68,85</sup>; **Fig.**  
337 **S5b-c**). These native EMSAs were hard to quantify due to accumulation of large  
338 protein/nucleic acid complexes in the wells. We therefore reduced the complexity of  
339 binding studies by quantifying the release of fluorescently-labeled ssRNA and ssDNA  
340 from A3B by incubating with a broad concentration range of otherwise identical  
341 unlabeled nucleic acid competitors. These experiments demonstrated that A3B binds  
342 strongly and nearly indistinguishably to both ssRNA and ssDNA (**Fig. 7b**).

343 RNA is an inferred inhibitor of the ssDNA cytosine deaminase activity of A3B  
344 based on experiments in which exogenous RNase A treatment is required to detect  
345 ssDNA deaminase activity in cancer cell extracts (e.g., refs.<sup>22,58</sup>). We therefore  
346 wondered whether the RNA in R-loop structures might inhibit the ssDNA deaminase  
347 activity of A3B on the unpaired ssDNA strand. Qualitative single timepoint reactions  
348 indicated clear activity on free ssDNA cytosines and potentially reduced activities on  
349 ssDNA cytosines in a bubble, short R-loop, and long R-loop structures (**Fig. 7c**). A  
350 quantitative time course comparing A3B activity on free ssDNA versus ssDNA in the  
351 context of an R-loop structure indicated that the latter substrate is only about 2-fold less  
352 preferred (**Fig. 7d**). These data showed that R-loops can be substrates for A3B-  
353 catalyzed ssDNA deamination. The 2-fold diminution in activity may be due to ssDNA  
354 inaccessibility caused by the relatively short nature of the synthetic R-loop (21  
355 nucleotides) and/or to competition with unpaired ssDNA or ssRNA.

356 To gain additional mechanistic insights into A3B function in R-loop biology, we  
357 analyzed the nucleoplasmic R-loop phenotypes of an A3B mutant defective in nuclear  
358 localization (Mut1)<sup>86</sup> and a mutant incapable of binding strongly to nucleic acid (Mut2)<sup>85</sup>.

359 Both of these activities are governed by the N-terminal domain (NTD) of A3B, and are  
360 independent of the C-terminal domain (CTD) that binds much more weakly to ssDNA  
361 and catalyzes deamination<sup>67,85,86</sup>. We confirmed the nuclear localization defect of the  
362 Mut1 and, interestingly, showed that Mut2 still retains this hallmark activity (**Fig. 7e**).  
363 Mut2 was also purified and, in contrast to the wild-type enzyme, confirmed defective in  
364 binding to ssRNA and ssDNA using EMSAs (**Fig. S5a** and **Fig. 7f**). However, Mut2 still  
365 retained high levels of ssDNA deaminase activity and was similarly active on free  
366 ssDNA and short R-loop ssDNA (**Fig. 7g**). This result is consistent with the possibility  
367 that unannealed nucleic acid may interfere with the deaminase activity of the WT  
368 enzyme (above) but not with Mut2, which has reduced nucleic acid binding activity.  
369 Most importantly, in contrast to WT A3B, neither mutant was capable of decreasing  
370 nucleoplasmic R-loop levels following JQ1 treatment (**Fig. 7h**). The separation-of-  
371 function Mut2 protein also had a diminished capacity to co-IP interactors (**Fig. S1f**).  
372 These results indicated that both nuclear localization and nucleic acid binding activities  
373 are required for A3B to alter nucleoplasmic R-loop levels.

374

### 375 **Genome-wide associations between APOBEC3 signature mutations, gene** 376 **overexpression, and splicing defects**

377 The involvement of A3B in transcription-dependent R-loop biology led us next to  
378 evaluate whether transcribed genes may be preferred sites of mutagenesis. Specifically,  
379 we propose a working model in which exposed ssDNA cytosines in R-loop regions are  
380 deaminated by A3B and resolved into mutagenic or non-mutagenic outcomes (**Fig. 8a**  
381 and **Discussion**). Non-mutagenic outcomes are likely to comprise most resolution

382 events, but these leave no genomic scars and, thus, are invisible to bioinformatics  
383 analyses. However, mutagenic R-loop resolution outcomes are predicted to reflect the  
384 intrinsic structural preference of A3B for deamination of cytosines in TC motifs<sup>7,87,88</sup> and  
385 more broadly in TCW and RTCW extended motifs as defined experimentally and  
386 computationally<sup>23,26</sup>. For comparison, A3A elicits a preference for YTCW<sup>23,26,89</sup>.

387 One prediction of this model is that a positive association may exist between  
388 transcription levels and APOBEC3-attributed mutations. Because previous studies  
389 established a correlation between gene expression and R-loop formation<sup>79</sup>, we  
390 predicted that higher rates of transcription should, at least at some loci, lead to higher  
391 rates of R-loop formation and increased exposure to A3B. This idea was addressed  
392 using whole-exome sequenced (WES) breast cancers and corresponding RNA-seq data  
393 from TCGA project as well as whole-genome sequenced (WGS) breast cancers from  
394 the ICGC consortium and normal breast tissue gene expression data from the GTEx  
395 project (Methods). An initial association between gene expression levels and  
396 APOBEC3-attributed mutations was intriguing but became insignificant after accounting  
397 for gene size (**Fig. S6a-b**). However, a strong positive association emerged between  
398 the magnitude of gene overexpression in breast cancer compared to normal breast  
399 tissue and the proportion of mutations attributable to APOBEC3 deamination (all TCW  
400 mutations in **Fig. 8b**,  $P < 1.0 \times 10^{-12}$  by student's t-test; RTCW/YTCW breakdown in **Fig.**  
401 **S6c**). These analyses indicated that the higher the degree of gene overexpression in  
402 breast cancer the higher the proportion of mutations attributable to APOBEC3, with the  
403 highest overexpressed gene group showing an average of over 50-fold more APOBEC3  
404 signature mutations than any of the three lowest expressed gene groups.

405           Second, because splicing defects lead to increases in R-loop formation<sup>90-92</sup>, our  
406 working model predicts that splice factor mutant tumors may manifest elevated levels of  
407 APOBEC3 signature mutations. This idea was investigated by splitting the TCGA breast  
408 cancer WES data set into tumors with and without mutations in splice factor genes and  
409 evaluating associations with the proportion of mutations attributable to APOBEC3  
410 activity. Remarkably, 53% of the breast tumors with mutant splice factor genes (43/81)  
411 had significant levels of APOBEC3 signature mutations (**Fig. 8c**). In contrast, only 35%  
412 of breast tumors without mutations in the same splice factor gene set (326/841) showed  
413 a detectable APOBEC3 mutation signature (**Fig. 8c**;  $P < 0.017$  by Fisher's exact test).  
414 APOBEC3-attributed mutations in both groups were partitioned into RTCW/YTCW  
415 tetranucleotide motifs and, interestingly, the A3B-associated RTCW motif was only  
416 absent from one of the splice factor mutant tumors (1/43) in comparison to a significant  
417 proportion of the non-splice factor mutant group (52/326) (**Fig. S6d-e**;  $P = 0.028$  by  
418 Fisher's exact test). Splice factor mutant tumors also had a higher mean percentage of  
419 APOBEC3-attributed mutations (39% vs 31%, respectively;  $P = 0.042$  by unpaired two-  
420 sample Welch's t-test) as well as higher total numbers of mutations on average than  
421 non-splice factor mutated samples ( $P = 0.0018$  by Welch's two sample t-test). Even the  
422 top quartile of tumors with the strongest APOBEC3 signature had higher total numbers  
423 of mutations in the splice factor mutant group ( $P = 0.0095$  by Welch's two sample t-test).  
424 These relationships between splice factor defects, higher mutation loads, and  
425 APOBEC3 mutation signature are not likely due to chance because no other similarly  
426 sized gene set selected randomly from housekeeping genes (100,000 random gene set  
427 selections) is similarly mutated in TCGA breast cancer data sets (*i.e.*, the observed

428 splice factor defects are not due to higher rates of mutation; rather, the observed splice  
429 factor defects are likely to contribute to the higher rates of mutation). We also noted that  
430 APOBEC3-attributed mutations accumulate preferentially on the non-transcribed strand  
431 (NTS) over the transcribed strand (TS) in both splice factor mutant and non-mutant  
432 tumor groups with a statistical difference that may relate to the underlying mechanism  
433 ( $P = 0.0284$  and  $P = 4.3 \times 10^{-12}$ , respectively, by student's t-test). In further support of a  
434 connection between aberrant splicing, R-loop formation, and APOBEC3 mutagenesis,  
435 A3B overexpression suppresses the increase in R-loop formation caused by treating  
436 U2OS cells with the splicing inhibitor pladienolide B (Plad B; **Fig. 8d**).

437 Third, because APOBEC3 signature *kataegic* events are undoubtedly due to  
438 strand-coordinated deamination by at least one APOBEC3 enzyme<sup>20,25</sup>, we asked what  
439 proportion of these events occur in genes and, moreover, occur on the NTS versus the  
440 TS to potentially reveal which part of the genome may be more susceptible. This  
441 analysis focused again on breast cancer due to the large size and overall high quality of  
442 the WGS data sets. A global mapping of all *kataegis* events in primary breast  
443 adenocarcinomas from the Pan-Cancer Analysis of Whole Genomes (PCAWG)  
444 revealed a bimodal distribution with one peak located within 1 kbp of a structural  
445 variation breakpoint (SV) and another similarly sized peak much further away from the  
446 nearest SV (~1 Mbp;  $n = 198$  WGS data sets; blue bars in **Fig. 8e**). As expected<sup>93</sup>, the  
447 SV-proximal subset of *kataegis* events is likely due to deamination of resected ssDNA  
448 ends during recombination repair. Also expected, non-clustered (*i.e.*, dispersed)  
449 APOBEC3-attributed mutations occur on average of >1 Mbp apart (yellow bars in **Fig.**  
450 **8e**). In contrast, the majority of APOBEC3-attributed *kataegic* events (>75%) map >10



451 kbp away from SVs and are unlikely to be due to a DNA double-stranded break and  
452 recombination-associated mechanism (red bars in **Fig. 8e**). Moreover, a significant  
453 proportion of these distal APOBEC3 signature *kataegic* events occur within R-loop  
454 regions defined above in DRIP-seq experiments.

455 To investigate the source of APOBEC3 signature *kataegis*, we plotted overall  
456 enrichments for A3B-associated RTCA and A3A-associated YTCA tetranucleotide  
457 motifs (R=A or G; Y=C or T)<sup>26</sup> and shaded data points red to distinguish breast tumors  
458 with at least one R-loop associated *kataegic* event. This analysis indicated, first, that  
459 tumors with APOBEC3 signature *kataegis* are common and, second, that APOBEC3  
460 *kataegic* mutations overlapping R-loop regions, in contrast to dispersed APOBEC3  
461 mutations, are skewed toward RTCA motifs (**Fig. 8f-g**; Q-values in each dot plot  
462 determined using Mann-Whitney U-tests). Third, the overall RTCW skew of *kataegic* ( $\geq 3$   
463 mutations per cluster) versus dispersed APOBEC3 mutations was greatest for  
464 mutations occurring on the NTS but still evident on the TS and intergenic regions (**Fig.**  
465 **8f**;  $P = 0.0006$ ,  $P = 0.0086$ , and  $P = 0.096$  respectively, by Fisher's exact tests after  
466 FDR correction). For greater stringency, this latter analysis was repeated for longer  
467 APOBEC3 *kataegic* tracts ( $\geq 5$  mutations per cluster) and a statistically significant  
468 enrichment was only evident for RTCA events on the NTS of genes [**Fig. 8g**;  $P = 0.0001$   
469 (NTS),  $P = 0.15$  (TS), and  $P = 0.072$  (intergenic)]. Representative NTS *kataegic* events  
470 are shown for *PRKCA* and *LGR5* (**Fig. 8h**). Taken together, these different bioinformatic  
471 analyses support a model in which at least a subset of R-loop structures is susceptible  
472 to C-to-U deamination events most likely catalyzed by A3B.

473



## 474 **Discussion**

475 Our studies are the first to report the cellular interactome of A3B and reveal an  
476 unanticipated role for this antiviral enzyme in R-loop biology. We delineate a functional  
477 relationship between A3B and R-loops with higher R-loop levels occurring upon A3B  
478 knockout/down and lower R-loop levels upon A3B overexpression. Genome-wide DRIP-  
479 seq experiments in physiological conditions and upon activation of a signal transduction  
480 pathway indicated that thousands of R-loops in cells are affected by A3B (*i.e.*, increased  
481 or decreased in *A3B*-null cells). This number represents over 10% of R-loops genome-  
482 wide, which is comparable to the proportions of R-loops affected by other R-loop  
483 regulatory factors, such as TOP1, DDX5, XRN2, and PRMT5<sup>80,94</sup>. These findings are  
484 also in line with knowledge that multiple proteins contribute to R-loop regulation,  
485 including RNase H1, TOP1, SETX, AQR, UAP56/DDX39B, FANCD2, and  
486 BRCA1/2<sup>38,45,80,94-103</sup>. Determining the precise combination of molecular mechanisms  
487 responsible for the regulation of a given R-loop remains a challenge for future studies.

488 In addition to discovering an unanticipated role for A3B in R-loop homeostasis,  
489 our studies also shed light on the underlying molecular mechanism of R-loop resolution.  
490 First, complementation experiments showed that the mechanism is deaminase-  
491 dependent with expression of a single amino acid catalytic mutant (E255A) failing to  
492 decrease nucleoplasmic R-loop levels. Second, the nuclear localization activity of A3B  
493 is essential. This requirement may seem obvious but is important to help rule-out  
494 potential indirect effects such as A3B binding to cytoplasmic factors and affecting their  
495 import into the nuclear compartment and participation in R-loop formation. Third, A3B is  
496 capable of binding to R-loop structures, and the strong nucleic acid binding activity of

497 A3B is required for suppressing nucleoplasmic R-loop levels. Our biochemical  
498 competition experiments indicated that ssRNA and ssDNA binding activities are  
499 comparable in strength. Together with the fact that A3B's strong nucleic acid binding  
500 activity resides within the N-terminal half of the protein and the weaker ssDNA binding  
501 activity required for catalysis is governed by the C-terminal half of the enzyme, we favor  
502 a working model in which direct binding of A3B to nascent ssRNA adjacent to R-loops  
503 and/or to ssDNA exposed in R-loop structures is critical for R-loop regulation (**Fig. 8a**).  
504 The next steps in such a mechanism may be deamination of exposed ssDNA cytosines  
505 in R-loop structures, uracil excision by UNG2, ssDNA breakage by APEX, and  
506 recruitment of additional downstream repair factors for resolution, by analogy to the  
507 resolution of AID-catalyzed R-loop associated deamination events in immunoglobulin  
508 gene switch regions<sup>41,42</sup> and APOBEC-catalyzed editing of R-loop DNA cytosines  
509 exposed in Cas9-mediated base editing reactions<sup>104</sup>. Additional tests of this model  
510 should consider complications from synthetic lethal interactions such as between A3B  
511 overexpression and UNG2 inhibition<sup>52</sup>. Moreover, the relationship between R-loop  
512 homeostasis and DNA repair is likely to be complex, and it is easy to imagine how  
513 perturbing R-loop levels in either direction (up or down) could lead to elevated DNA  
514 damage responses (e.g.,  $\gamma$ -H2AX accumulation), as observed here with A3B-deficient  
515 cells and elsewhere with other factors<sup>80,95,96,99,105,106</sup>. Notably, forced overexpression of  
516 A3B can also cause elevated DNA damage responses including  $\gamma$ -H2AX  
517 accumulation<sup>22,52,107</sup>.

518 This proposed mechanism is likely to lead to predominately error-free resolution,  
519 which cannot be detected by bioinformatic genomic analyses. However, a subset of the

520 uracil lesions and/or abasic sites may lead to APOBEC3 signature mutations and, if  
521 clustered, to APOBEC3 *kataegic* events. The possibility of such mutagenic outcomes is  
522 supported by a dose-responsive association between genes overexpressed in breast  
523 cancers compared to normal breast tissue and the proportions of somatic mutations  
524 attributed to APOBEC3 deamination (**Fig. 8b**). Moreover, a preferential accumulation of  
525 APOBEC3-attributed mutations is also observed in splice factor mutant breast tumors  
526 (**Fig. 8c**). As transcription and splicing are interconnected processes<sup>108</sup> and splice factor  
527 defects are known to increase R-loop levels<sup>90-92,109</sup>, it is easy to imagine how  
528 perturbations in these processes may contribute to increased R-loop formation and  
529 exposures of single-stranded cytosines to APOBEC3 deaminase activity. This possibility  
530 is further supported by recent bioinformatic studies indicating higher APOBEC3  
531 mutation densities on the NTS of actively expressed genes (including the  
532 overexpressed genes analyzed here) in multiple cancer types<sup>110</sup>. We cannot exclude  
533 the possibility that other APOBEC3 enzymes, most notably A3A, may also be able to  
534 contribute to R-loop mutation. However, this alternative is disfavored because A3A  
535 overexpression does not affect R-loop levels and, importantly, the majority of APOBEC3  
536 *kataegic* events are observed far away from sites of structural variation and are  
537 enriched for mutations in A3B-associated 5'-RTCW motifs (**Fig. 8e-h**).

538 In addition, because a proportion of APOBEC3 mutagenesis is likely due to  
539 deamination of lagging-strand templates during DNA replication<sup>29-31,33,34,94</sup>, it is  
540 important to emphasize that APOBEC3-catalyzed C-to-U lesions in transcription-  
541 associated R-loop structures are likely to attract different subsets of DNA repair  
542 enzymes. A uracil in the DNA replication template strand will instruct the proper

543 insertion of an adenine in the nascent strand, which leaves a U:A base pair for UNG2  
544 recognition and faithful uracil base excision repair with the net result being a C-to-T  
545 transition. A uracil in an R-loop, following R-loop resolution, will lead to a U/G mispair,  
546 which may similarly template the insertion of an adenine through replication but can also  
547 attract mismatch repair enzymes, which could promote the creation of a longer ssDNA  
548 tract and additional APOBEC3 mutagenesis. This possibility is supported by recent  
549 results showing a mismatch repair-dependent synthetic lethal interaction between A3B  
550 activity and uracil excision repair disruption<sup>52</sup> and a role for mismatch repair in the  
551 creation of *omikli* (shorter-than-*kataegic* tracts of APOBEC3-attributed mutations)<sup>111</sup>. It  
552 is also supported by precedents with AID-dependent antibody gene diversification in B  
553 lymphocytes where both uracil base excision repair and mismatch repair have integral  
554 roles<sup>41,42</sup>. Of course, uracil lesions in both DNA replication template strands and R-loops  
555 can lead to alternative outcomes including uracil excision, abasic site bypass or  
556 cleavage, single- and double-stranded DNA breaks, and larger-scale genetic  
557 aberrations including translocations. A3B-mediated mutagenesis may be particularly  
558 relevant in cancer cells that display both increased A3B expression and R-loop  
559 dysregulation resulting from mutations in splice factors or other R-loop regulatory  
560 factors (e.g., BRCA1/2 and Fanconi anemia proteins<sup>99,100,102,112,113</sup>) and/or activation of  
561 signal transduction pathway-induced transcriptional programs<sup>82,83</sup> such as during  
562 conditions of oncogenic signaling, infection, or inflammation<sup>58,114,115</sup>. Therefore, in  
563 addition to archetypic base substitution mutations, it is tempting to speculate that at  
564 least some R-loop-associated DNA damage and chromosome aberrations (reviewed by  
565 refs.<sup>39,46,48,116</sup>) may be instigated by the A3B-dependent mechanism described here.

566 In addition to the resolution mechanism discussed above, a potentially  
567 overlapping alternative is A3B-dependent recruitment of other proteins known to  
568 promote R-loop resolution. Such interactions could be direct or bridged, for instance, by  
569 RNA or ssDNA. In support of this possibility, the A3B separation-of-function mutant  
570 Mut2, which is deficient in nucleic acid binding but proficient in nuclear import and DNA  
571 deamination, is less capable of interacting with several R-loop associated factors (Fig.  
572 S1f). Moreover, although our studies here focused on AP-MS interactions specific to  
573 A3B (absent from all controls), a number of A3B-enriched factors (present at lower  
574 levels in at least one control reaction), such as the helicase DHX9, might be worthy of  
575 future investigation. This DNA/RNA helicase was reported recently as a suppressor of  
576 the antiviral activity of A3B<sup>117</sup>. It is harder to envisage a mechanism to explain the  
577 subset of genes that elicit decreased R-loop levels in the absence of A3B. In these  
578 instances, A3B may be blocking a known resolution activity, such as a helicase that  
579 loads via RNA or ssDNA, from gaining access to R-loops. Further studies on A3B  
580 regulation of R-loop homeostasis will undoubtedly be exciting as answers will shed  
581 additional light on R-loop biology, provide insights into the normal physiological  
582 functions of A3B in innate antiviral immune responses, and may help define additional  
583 targetable nodes in A3B-overexpressing tumor types such as breast cancer.

584

## 585 **Acknowledgements**

586 We thank N.J. Proudfoot for critically reading the manuscript, J. Becker and J. Duda for  
587 corroborative localization data with A3B mutants, the University of Minnesota Imaging  
588 Center for access to instrumentation, and the Oxford Genomics Centre at the Wellcome

589 Centre for Human Genetics (funded by Wellcome Trust grant 203141/Z/16/Z) for the  
590 generation and initial processing of the sequencing data. This work was supported by  
591 NCI P01 CA234228 (to RSH), NIAID R37 AI064046 (to RSH), and by the University of  
592 Minnesota Masonic Cancer Center, Academic Health Center, and College of Biological  
593 Sciences. NG lab is supported by the Royal Society University Research fellowship  
594 (BVD07340), Royal Society Enhancement Award (RGF\EA\180023) and EPA Research  
595 Fund (Sir William Dunn School of Pathology, University of Oxford) to NG and CRUK  
596 development fund (CRUK DF-0119) to AC and NG. MT and SM are supported by the  
597 Wellcome Trust Investigator Award to SM (WT210641/Z/18/Z). KMM lab was supported  
598 by NCI RO1 CA198279 and NCI RO1 CA201268. LBA lab was supported by US NIH  
599 R01 ES030993 and R01 ES032547. Salary support for JLM was provided initially by an  
600 NSF Graduate Research Fellowship (Grant Number 00039202) and subsequently by  
601 HHMI. Salary support for MCJ was provided in part by T32 CA009138 and  
602 subsequently NCI F31 CA243306. Salary support for BS was provided by HHMI with  
603 some supplies provided by the Ovarian Cancer Research Alliance (Ann and Sol  
604 Schreiber Mentored Investigator Award 812337). Salary support for DJS was provided  
605 by NIAID K99 AI147811. RSH is the Margaret Harvey Schering Land Grant Chair for  
606 Cancer Research, a Distinguished University McKnight Professor, and an Investigator  
607 of the Howard Hughes Medical Institute.

608

## 609 **Author contributions**

610 R.S.H., J.L.M., A.C. and N.G. conceived and designed these studies. J.L.M. and A.C.  
611 performed experiments unless otherwise noted. E.K.L. generated U2OS knockdown

612 and complement cell lines along with assisted in tissue culture and genomic DNA  
613 isolations for dot blot experiments. S.L., J.K. and K.M.M. performed and quantified IF  
614 data. M.T. and S.M. conducted DRIP-seq and ChIP-seq data analysis. C.B. performed  
615 DRIP-qPCR validations and HeLa R-loop IP. B.S. assisted with cell culture experiments  
616 and R-loop quantification. M.R.B. assisted with cell culture studies. M.C.J., N.A.T.,  
617 D.J.S., E.N.B. and L.B.A. performed bioinformatic analyses. M.A.C. contributed  
618 biochemical experiments. R.S.H. and J.L.M. drafted the manuscript with input from all  
619 other authors.

620

## 621 **Competing interest statement**

622 The authors have no conflicts to declare.

623

## 624 **References**

- 625 1. Green, A.M. & Weitzman, M.D. The spectrum of APOBEC3 activity: from anti-viral  
626 agents to anti-cancer opportunities. *DNA Repair (Amst)* **83**, 102700 (2019).
- 627 2. Harris, R.S. & Dudley, J.P. APOBECs and virus restriction. *Virology* **479-480**, 131-45  
628 (2015).
- 629 3. Sheehy, A.M., Gaddis, N.C., Choi, J.D. & Malim, M.H. Isolation of a human gene that  
630 inhibits HIV-1 infection and is suppressed by the viral Vif protein. *Nature* **418**,  
631 646-50 (2002).
- 632 4. Harris, R.S. *et al.* DNA deamination mediates innate immunity to retroviral infection.  
633 *Cell* **113**, 803-9 (2003).

- 634 5. Zhang, H. *et al.* The cytidine deaminase CEM15 induces hypermutation in newly  
635 synthesized HIV-1 DNA. *Nature* **424**, 94-8 (2003).
- 636 6. Mangeat, B. *et al.* Broad antiretroviral defence by human APOBEC3G through lethal  
637 editing of nascent reverse transcripts. *Nature* **424**, 99-103 (2003).
- 638 7. Shi, K. *et al.* Structural basis for targeted DNA cytosine deamination and  
639 mutagenesis by APOBEC3A and APOBEC3B. *Nat Struct Mol Biol* **24**, 131-139  
640 (2017).
- 641 8. Kohli, R.M. *et al.* Local sequence targeting in the AID/APOBEC family differentially  
642 impacts retroviral restriction and antibody diversification. *J Biol Chem* **285**,  
643 40956-64 (2010).
- 644 9. Rathore, A. *et al.* The local dinucleotide preference of APOBEC3G can be altered  
645 from 5'-CC to 5'-TC by a single amino acid substitution. *J Mol Biol* **425**, 4442-54  
646 (2013).
- 647 10. Wang, M., Rada, C. & Neuberger, M.S. Altering the spectrum of immunoglobulin V  
648 gene somatic hypermutation by modifying the active site of AID. *J Exp Med* **207**,  
649 141-53 (2010).
- 650 11. Carpenter, M.A., Rajagurubandara, E., Wijesinghe, P. & Bhagwat, A.S.  
651 Determinants of sequence-specificity within human AID and APOBEC3G. *DNA*  
652 *Repair (Amst)* **9**, 579-87 (2010).
- 653 12. Swanton, C., McGranahan, N., Starrett, G.J. & Harris, R.S. APOBEC enzymes:  
654 mutagenic fuel for cancer evolution and heterogeneity. *Cancer Discov* **5**, 704-12  
655 (2015).



- 656 13. Siriwardena, S.U., Chen, K. & Bhagwat, A.S. Functions and malfunctions of  
657 mammalian DNA-cytosine deaminases. *Chem Rev* **116**, 12688-12710 (2016).
- 658 14. Venkatesan, S. *et al.* Perspective: APOBEC mutagenesis in drug resistance and  
659 immune escape in HIV and cancer evolution. *Ann Oncol* **29**, 563-572 (2018).
- 660 15. Roberts, S.A. & Gordenin, D.A. Hypermutation in human cancer genomes: footprints  
661 and mechanisms. *Nat Rev Cancer* **14**, 786-800 (2014).
- 662 16. Helleday, T., Eshtad, S. & Nik-Zainal, S. Mechanisms underlying mutational  
663 signatures in human cancers. *Nat Rev Genet* **15**, 585-98 (2014).
- 664 17. Casellas, R. *et al.* Mutations, kataegis and translocations in B cells: understanding  
665 AID promiscuous activity. *Nat Rev Immunol* **16**, 164-76 (2016).
- 666 18. Basso, K. & Dalla-Favera, R. Germinal centres and B cell lymphomagenesis. *Nat*  
667 *Rev Immunol* **15**, 172-84 (2015).
- 668 19. Liu, M. *et al.* Two levels of protection for the B cell genome during somatic  
669 hypermutation. *Nature* **451**, 841-5 (2008).
- 670 20. Alexandrov, L.B. *et al.* The repertoire of mutational signatures in human cancer.  
671 *Nature* **578**, 94-101 (2020).
- 672 21. Burns, M.B., Temiz, N.A. & Harris, R.S. Evidence for APOBEC3B mutagenesis in  
673 multiple human cancers. *Nat Genet* **45**, 977-83 (2013).
- 674 22. Burns, M.B. *et al.* APOBEC3B is an enzymatic source of mutation in breast cancer.  
675 *Nature* **494**, 366-70 (2013).
- 676 23. Roberts, S.A. *et al.* An APOBEC cytidine deaminase mutagenesis pattern is  
677 widespread in human cancers. *Nat Genet* **45**, 970-6 (2013).

- 678 24. Alexandrov, L.B. *et al.* Signatures of mutational processes in human cancer. *Nature*  
679 **500**, 415-21 (2013).
- 680 25. Nik-Zainal, S. *et al.* Mutational processes molding the genomes of 21 breast  
681 cancers. *Cell* **149**, 979-93 (2012).
- 682 26. Chan, K. *et al.* An APOBEC3A hypermutation signature is distinguishable from the  
683 signature of background mutagenesis by APOBEC3B in human cancers. *Nat*  
684 *Genet* **47**, 1067-72 (2015).
- 685 27. Nik-Zainal, S. *et al.* Association of a germline copy number polymorphism of  
686 APOBEC3A and APOBEC3B with burden of putative APOBEC-dependent  
687 mutations in breast cancer. *Nat Genet* **46**, 487-91 (2014).
- 688 28. Cortez, L.M. *et al.* APOBEC3A is a prominent cytidine deaminase in breast cancer.  
689 *PLoS Genet* **15**, e1008545 (2019).
- 690 29. Seplyarskiy, V.B. *et al.* APOBEC-induced mutations in human cancers are strongly  
691 enriched on the lagging DNA strand during replication. *Genome Res* **26**, 174-82  
692 (2016).
- 693 30. Hoopes, J.I. *et al.* APOBEC3A and APOBEC3B preferentially deaminates the  
694 lagging strand template during DNA replication. *Cell Rep* **14**, 1273-1282 (2016).
- 695 31. Bhagwat, A.S. *et al.* Strand-biased cytosine deamination at the replication fork  
696 causes cytosine to thymine mutations in *Escherichia coli*. *Proc Natl Acad Sci U S*  
697 *A* **113**, 2176-81 (2016).
- 698 32. Haradhvala, N.J. *et al.* Mutational strand asymmetries in cancer genomes reveal  
699 mechanisms of DNA damage and repair. *Cell* **164**, 538-49 (2016).

- 700 33. Morganella, S. *et al.* The topography of mutational processes in breast cancer  
701 genomes. *Nat Commun* **7**, 11383 (2016).
- 702 34. Sui, Y. *et al.* Analysis of APOBEC-induced mutations in yeast strains with low levels  
703 of replicative DNA polymerases. *Proc Natl Acad Sci U S A* **117**, 9440-9450  
704 (2020).
- 705 35. Nik-Zainal, S. *et al.* Landscape of somatic mutations in 560 breast cancer whole-  
706 genome sequences. *Nature* **534**, 47-54 (2016).
- 707 36. Buisson, R. *et al.* Passenger hotspot mutations in cancer driven by APOBEC3A and  
708 mesoscale genomic features. *Science* **364**(2019).
- 709 37. Taylor, B.J. *et al.* DNA deaminases induce break-associated mutation showers with  
710 implication of APOBEC3B and 3A in breast cancer kataegis. *Elife* **2**, e00534  
711 (2013).
- 712 38. García-Muse, T. & Aguilera, A. R Loops: from physiological to pathological roles.  
713 *Cell* **179**, 604-618 (2019).
- 714 39. Crossley, M.P., Bocek, M. & Cimprich, K.A. R-Loops as cellular regulators and  
715 genomic threats. *Mol Cell* **73**, 398-411 (2019).
- 716 40. Belotserkovskii, B.P., Tornaletti, S., D'Souza, A.D. & Hanawalt, P.C. R-loop  
717 generation during transcription: Formation, processing and cellular outcomes.  
718 *DNA Repair (Amst)* **71**, 69-81 (2018).
- 719 41. Zanotti, K.J. & Gearhart, P.J. Antibody diversification caused by disrupted mismatch  
720 repair and promiscuous DNA polymerases. *DNA Repair (Amst)* **38**, 110-116  
721 (2016).

- 722 42. Pilzecker, B. & Jacobs, H. Mutating for good: DNA damage responses during  
723 somatic hypermutation. *Front Immunol* **10**, 438 (2019).
- 724 43. Hamperl, S., Bocek, M.J., Saldivar, J.C., Swigut, T. & Cimprich, K.A. Transcription-  
725 replication conflict orientation modulates R-Loop levels and activates distinct  
726 DNA damage responses. *Cell* **170**, 774-786.e19 (2017).
- 727 44. Kim, J.J. *et al.* Systematic bromodomain protein screens identify homologous  
728 recombination and R-loop suppression pathways involved in genome integrity.  
729 *Genes Dev* **33**, 1751-1774 (2019).
- 730 45. Bayona-Feliu, A., Barroso, S., Muñoz, S. & Aguilera, A. The SWI/SNF chromatin  
731 remodeling complex helps resolve R-loop-mediated transcription-replication  
732 conflicts. *Nat Genet* **53**, 1050-1063 (2021).
- 733 46. Sollier, J. & Cimprich, K.A. Breaking bad: R-loops and genome integrity. *Trends Cell*  
734 *Biol* **25**, 514-22 (2015).
- 735 47. Aguilera, A. & García-Muse, T. R loops: from transcription byproducts to threats to  
736 genome stability. *Mol Cell* **46**, 115-24 (2012).
- 737 48. Skourti-Stathaki, K. & Proudfoot, N.J. A double-edged sword: R loops as threats to  
738 genome integrity and powerful regulators of gene expression. *Genes Dev* **28**,  
739 1384-96 (2014).
- 740 49. Richard, P. & Manley, J.L. R Loops and links to human disease. *J Mol Biol* **429**,  
741 3168-3180 (2017).
- 742 50. Groh, M. & Gromak, N. Out of balance: R-loops in human disease. *PLoS Genet* **10**,  
743 e1004630 (2014).

- 744 51. Wells, J.P., White, J. & Stirling, P.C. R Loops and their composite cancer  
745 connections. *Trends Cancer* **5**, 619-631 (2019).
- 746 52. Serebrenik, A.A. *et al.* The deaminase APOBEC3B triggers the death of cells  
747 lacking uracil DNA glycosylase. *Proc Natl Acad Sci U S A* **116**, 22158-22163  
748 (2019).
- 749 53. Cristini, A., Groh, M., Kristiansen, M.S. & Gromak, N. RNA/DNA hybrid interactome  
750 identifies DXH9 as a molecular player in transcriptional termination and R-Loop-  
751 associated DNA damage. *Cell Rep* **23**, 1891-1905 (2018).
- 752 54. McCann, J.L. *et al.* The DNA deaminase APOBEC3B interacts with the cell-cycle  
753 protein CDK4 and disrupts CDK4-mediated nuclear import of Cyclin D1. *J Biol*  
754 *Chem* **294**, 12099-12111 (2019).
- 755 55. McCann, J.L., Salamango, D.J., Law, E.K., Brown, W.L. & Harris, R.S. MagnEdit-  
756 interacting factors that recruit DNA-editing enzymes to single base targets. *Life*  
757 *Sci Alliance* **3**, e201900606 (2020).
- 758 56. Boguslawski, S.J. *et al.* Characterization of monoclonal antibody to DNA:RNA and  
759 its application to immunodetection of hybrids. *J Immunol Methods* **89**, 123-30  
760 (1986).
- 761 57. Phillips, D.D. *et al.* The sub-nanomolar binding of DNA-RNA hybrids by the single-  
762 chain Fv fragment of antibody S9.6. *J Mol Recognit* **26**, 376-81 (2013).
- 763 58. Leonard, B. *et al.* The PKC/NF- $\kappa$ B signaling pathway induces APOBEC3B  
764 expression in multiple human cancers. *Cancer Res* **75**, 4538-47 (2015).

- 765 59. El Hage, A., French, S.L., Beyer, A.L. & Tollervey, D. Loss of Topoisomerase I leads  
766 to R-loop-mediated transcriptional blocks during ribosomal RNA synthesis.  
767 *Genes Dev* **24**, 1546-58 (2010).
- 768 60. Tuduri, S. *et al.* Topoisomerase I suppresses genomic instability by preventing  
769 interference between replication and transcription. *Nat Cell Biol* **11**, 1315-24  
770 (2009).
- 771 61. Smolka, J.A., Sanz, L.A., Hartono, S.R. & Chédin, F. Recognition of RNA by the  
772 S9.6 antibody creates pervasive artifacts when imaging RNA:DNA hybrids. *J Cell*  
773 *Biol* **220**, e202004079 (2021).
- 774 62. Cheng, A.Z. *et al.* Epstein-Barr virus BORF2 inhibits cellular APOBEC3B to  
775 preserve viral genome integrity. *Nat Microbiol* **4**, 78-88 (2019).
- 776 63. Jarvis, M.C., Ebrahimi, D., Temiz, N.A. & Harris, R.S. Mutation signatures including  
777 APOBEC in cancer cell lines. *JNCI Cancer Spectr* **2**, pky002 (2018).
- 778 64. Leonard, B. *et al.* APOBEC3B upregulation and genomic mutation patterns in  
779 serous ovarian carcinoma. *Cancer Res* **73**, 7222-31 (2013).
- 780 65. Edwards, D.S. *et al.* BRD4 prevents R-Loop formation and transcription-replication  
781 conflicts by ensuring efficient transcription elongation. *Cell Rep* **32**, 108166  
782 (2020).
- 783 66. Lam, F.C. *et al.* BRD4 prevents the accumulation of R-loops and protects against  
784 transcription-replication collision events and DNA damage. *Nat Commun* **11**,  
785 4083 (2020).

- 786 67. Ito, F., Fu, Y., Kao, S.A., Yang, H. & Chen, X.S. Family-wide comparative analysis  
787 of cytidine and methylcytidine deamination by eleven human APOBEC proteins.  
788 *J Mol Biol* **429**, 1787-1799 (2017).
- 789 68. Adolph, M.B., Love, R.P., Feng, Y. & Chelico, L. Enzyme cycling contributes to  
790 efficient induction of genome mutagenesis by the cytidine deaminase  
791 APOBEC3B. *Nucleic Acids Res* **45**, 11925-11940 (2017).
- 792 69. DeNizio, J.E., Schutsky, E.K., Berrios, K.N., Liu, M.Y. & Kohli, R.M. Harnessing  
793 natural DNA modifying activities for editing of the genome and epigenome. *Curr*  
794 *Opin Chem Biol* **45**, 10-17 (2018).
- 795 70. Olson, M.E., Harris, R.S. & Harki, D.A. APOBEC enzymes as targets for virus and  
796 cancer therapy. *Cell Chem Biol* **25**, 36-49 (2018).
- 797 71. Chaurasiya, K.R. *et al.* Oligomerization transforms human APOBEC3G from an  
798 efficient enzyme to a slowly dissociating nucleic acid-binding protein. *Nat Chem*  
799 **6**, 28-33 (2014).
- 800 72. Ara, A., Love, R.P. & Chelico, L. Different mutagenic potential of HIV-1 restriction  
801 factors APOBEC3G and APOBEC3F is determined by distinct single-stranded  
802 DNA scanning mechanisms. *PLoS Pathog* **10**, e1004024 (2014).
- 803 73. Chelico, L., Prochnow, C., Erie, D.A., Chen, X.S. & Goodman, M.F. Structural model  
804 for deoxycytidine deamination mechanisms of the HIV-1 inactivation enzyme  
805 APOBEC3G. *J Biol Chem* **285**, 16195-205 (2010).
- 806 74. Bennett, R.P., Salter, J.D., Liu, X., Wedekind, J.E. & Smith, H.C. APOBEC3G  
807 subunits self-associate via the C-terminal deaminase domain. *J Biol Chem* **283**,  
808 33329-36 (2008).

- 809 75. Li, J. *et al.* APOBEC3 multimerization correlates with HIV-1 packaging and  
810 restriction activity in living cells. *J Mol Biol* **426**, 1296-307 (2014).
- 811 76. Allison, D.F. & Wang, G.G. R-loops: formation, function, and relevance to cell  
812 stress. *Cell Stress* **3**, 38-46 (2019).
- 813 77. Bensaude, O. Inhibiting eukaryotic transcription: Which compound to choose? How  
814 to evaluate its activity? *Transcription* **2**, 103-108 (2011).
- 815 78. Wang, Y., Lu, J.J., He, L. & Yu, Q. Triptolide (TPL) inhibits global transcription by  
816 inducing proteasome-dependent degradation of RNA polymerase II (Pol II). *PLoS*  
817 *One* **6**, e23993 (2011).
- 818 79. Sanz, L.A. *et al.* Prevalent, dynamic, and conserved R-Loop structures associate  
819 with specific epigenomic signatures in mammals. *Mol Cell* **63**, 167-78 (2016).
- 820 80. Manzo, S.G. *et al.* DNA Topoisomerase I differentially modulates R-loops across the  
821 human genome. *Genome Biol* **19**, 100 (2018).
- 822 81. Nojima, T. *et al.* Deregulated expression of mammalian lncRNA through loss of  
823 SPT6 induces R-Loop formation, replication stress, and cellular senescence. *Mol*  
824 *Cell* **72**, 970-984.e7 (2018).
- 825 82. Kotsantis, P. *et al.* Increased global transcription activity as a mechanism of  
826 replication stress in cancer. *Nat Commun* **7**, 13087 (2016).
- 827 83. Stork, C.T. *et al.* Co-transcriptional R-loops are the main cause of estrogen-induced  
828 DNA damage. *Elife* **5**, e17548 (2016).
- 829 84. Holden, N.S. *et al.* Phorbol ester-stimulated NF- $\kappa$ B-dependent transcription: roles for  
830 isoforms of novel protein kinase C. *Cell Signal* **20**, 1338-48 (2008).



- 831 85. Xiao, X. *et al.* Structural determinants of APOBEC3B non-catalytic domain for  
832 molecular assembly and catalytic regulation. *Nucleic Acids Res* **45**, 7540 (2017).
- 833 86. Salamango, D.J. *et al.* APOBEC3B nuclear localization requires two distinct N-  
834 terminal domain surfaces. *J Mol Biol* **430**, 2695-2708 (2018).
- 835 87. Hou, S. *et al.* Structural Analysis of the Active Site and DNA Binding of Human  
836 Cytidine Deaminase APOBEC3B. *J Chem Theory Comput* **15**, 637-647 (2019).
- 837 88. Shi, K. *et al.* Active site plasticity and possible modes of chemical inhibition of the  
838 human DNA deaminase APOBEC3B. *FASEB Bioadv* **2**, 49-58 (2020).
- 839 89. Law, E.K. *et al.* APOBEC3A catalyzes mutation and drives carcinogenesis in vivo. *J*  
840 *Exp Med* **217**(2020).
- 841 90. Li, X. & Manley, J.L. Inactivation of the SR protein splicing factor ASF/SF2 results in  
842 genomic instability. *Cell* **122**, 365-78 (2005).
- 843 91. Chen, L. *et al.* The augmented R-Loop is a unifying mechanism for myelodysplastic  
844 syndromes induced by high-risk splicing factor mutations. *Mol Cell* **69**, 412-  
845 425.e6 (2018).
- 846 92. Wan, Y. *et al.* Splicing function of mitotic regulators links R-loop-mediated DNA  
847 damage to tumor cell killing. *J Cell Biol* **209**, 235-46 (2015).
- 848 93. ICGC/TCGA. Pan-cancer analysis of whole genomes. *Nature* **578**, 82-93 (2020).
- 849 94. Villarreal, O.D., Mersaoui, S.Y., Yu, Z., Masson, J.Y. & Richard, S. Genome-wide R-  
850 loop analysis defines unique roles for DDX5, XRN2, and PRMT5 in DNA/RNA  
851 hybrid resolution. *Life Sci Alliance* **3**, e202000762 (2020).

- 852 95. Pérez-Calero, C. *et al.* UAP56/DDX39B is a major cotranscriptional RNA-DNA  
853 helicase that unwinds harmful R loops genome-wide. *Genes Dev* **34**, 898-912  
854 (2020).
- 855 96. Cohen, S. *et al.* Senataxin resolves RNA:DNA hybrids forming at DNA double-  
856 strand breaks to prevent translocations. *Nat Commun* **9**, 533 (2018).
- 857 97. Skourti-Stathaki, K., Proudfoot, N.J. & Gromak, N. Human senataxin resolves  
858 RNA/DNA hybrids formed at transcriptional pause sites to promote Xrn2-  
859 dependent termination. *Mol Cell* **42**, 794-805 (2011).
- 860 98. Sollier, J. *et al.* Transcription-coupled nucleotide excision repair factors promote R-  
861 loop-induced genome instability. *Mol Cell* **56**, 777-85 (2014).
- 862 99. Bhatia, V. *et al.* BRCA2 prevents R-loop accumulation and associates with TREX-2  
863 mRNA export factor PCID2. *Nature* **511**, 362-5 (2014).
- 864 100. Shivji, M.K.K., Renaudin, X., Williams, Ç. & Venkitaraman, A.R. BRCA2 regulates  
865 transcription elongation by RNA Polymerase II to prevent R-Loop accumulation.  
866 *Cell Rep* **22**, 1031-1039 (2018).
- 867 101. Chen, L. *et al.* R-ChIP using inactive RNase H reveals dynamic coupling of R-  
868 loops with transcriptional pausing at gene promoters. *Mol Cell* **68**, 745-757.e5  
869 (2017).
- 870 102. Hatchi, E. *et al.* BRCA1 recruitment to transcriptional pause sites is required for R-  
871 loop-driven DNA damage repair. *Mol Cell* **57**, 636-647 (2015).
- 872 103. Liang, Z. *et al.* Binding of FANCI-FANCD2 complex to RNA and R-Loops  
873 stimulates robust FANCD2 monoubiquitination. *Cell Rep* **26**, 564-572.e5 (2019).

- 874 104. Gu, S., Bodai, Z., Cowan, Q.T. & Komor, A.C. Base editors: Expanding the types  
875 of DNA damage products harnessed for genome editing. *Gene Genome Ed*  
876 **1**(2021).
- 877 105. Morales, J.C. *et al.* XRN2 links transcription termination to DNA damage and  
878 replication stress. *PLoS Genet* **12**, e1006107 (2016).
- 879 106. Mersaoui, S.Y. *et al.* Arginine methylation of the DDX5 helicase RGG/RG motif by  
880 PRMT5 regulates resolution of RNA:DNA hybrids. *EMBO J* **38**, e100986 (2019).
- 881 107. Nikkila, J. *et al.* Elevated APOBEC3B expression drives a kataegic-like mutation  
882 signature and replication stress-related therapeutic vulnerabilities in p53-  
883 defective cells. *Br J Cancer* **117**, 113-123 (2017).
- 884 108. Tellier, M., Maudlin, I. & Murphy, S. Transcription and splicing: A two-way street.  
885 *Wiley Interdiscip Rev RNA* **11**, e1593 (2020).
- 886 109. Zhang, J. *et al.* Disease-causing mutations in SF3B1 alter splicing by disrupting  
887 interaction with SUGP1. *Mol Cell* **76**, 82-95.e7 (2019).
- 888 110. Chervova, A. *et al.* Analysis of gene expression and mutation data points on  
889 contribution of transcription to the mutagenesis by APOBEC enzymes. *NAR*  
890 *Cancer* **3**, zcab025 (2021).
- 891 111. Mas-Ponte, D. & Supek, F. DNA mismatch repair promotes APOBEC3-mediated  
892 diffuse hypermutation in human cancers. *Nat Genet* **52**, 958-968 (2020).
- 893 112. García-Rubio, M.L. *et al.* The Fanconi anemia pathway protects genome integrity  
894 from R-loops. *PLoS Genet* **11**, e1005674 (2015).
- 895 113. Schwab, R.A. *et al.* The Fanconi anemia pathway maintains genome stability by  
896 coordinating replication and transcription. *Mol Cell* **60**, 351-61 (2015).

- 897 114. Periyasamy, M. *et al.* Induction of APOBEC3B expression by chemotherapy drugs  
898 is mediated by DNA-PK-directed activation of NF- $\kappa$ B. *Oncogene* **40**, 1077-1090  
899 (2021).
- 900 115. Roelofs, P.A. *et al.* Characterization of the mechanism by which the RB/E2F  
901 pathway controls expression of the cancer genomic DNA deaminase  
902 APOBEC3B. *Elife* **9**(2020).
- 903 116. Hamperl, S. & Cimprich, K.A. The contribution of co-transcriptional RNA:DNA  
904 hybrid structures to DNA damage and genome instability. *DNA Repair (Amst)* **19**,  
905 84-94 (2014).
- 906 117. Chen, Y. *et al.* DHX9 interacts with APOBEC3B and attenuates the anti-HBV effect  
907 of APOBEC3B. *Emerg Microbes Infect* **9**, 366-377 (2020).
- 908
- 909

910 **Figure legends**

911

912 **Fig. 1. A3B interacts with R-loop-associated proteins**

913 **a**, Information on shared proteins between A3B and S9.6 AP-MS datasets.

914 **b**, Pie chart depicting overlap between A3B and S9.6 AP-MS datasets.

915 **c**, Immunoblot and IF microscopy analysis of MCF10A-TREx-A3B-eGFP cells treated  
916 with vehicle or Dox (1  $\mu\text{g}/\text{mL}$ , 24 hrs). Nuclear A3B-eGFP is green and nuclear DNA is  
917 blue (DAPI; representative images; 10  $\mu\text{m}$  scale bar).

918 **d**, Immunoblots of A3B-eGFP or IgG IP from TREx-A3B-eGFP MCF10A cells +/- Dox (1  
919  $\mu\text{g}/\text{ml}$ , 24 hrs), treated with PMA (25 ng/ml, 2 hrs), and probed with indicated antibodies  
920 (upper images). Slot blot of A3B-eGFP IP from TREx-A3B-eGFP MCF10A cells +/- Dox  
921 (1  $\mu\text{g}/\text{ml}$ , 24 hrs) probed with S9.6 antibody (lower images). RNase H (RNH) treatment  
922 confirmed specificity of R-loop signal.

923 **e**, Immunoblots of the indicated proteins in input lysates and S9.6 IP reactions from  
924 MCF10A (WT) or A3B-null derivatives (KO) treated with PMA (25 ng/ml, 5 hrs). R-loop  
925 specificity is indicated by signal depletion by RNA/DNA hybrid competitor.

926

927 **Fig. 2. Elevated nuclear R-loop levels in A3B-null and A3B-depleted cells**

928 **a-b**, IF images and quantification of MCF10A (WT) and A3B-null (KO) cells stained with  
929 S9.6 (green) and DAPI (blue). Diminution of nucleoplasmic S9.6 signal by exogenous  
930 RNase H (RNH) confirmed signal specificity (representative images; 5  $\mu\text{m}$  scale bar;  $n >$   
931 100 nuclei per condition; red bars represent mean  $\pm$  SEM; \*\*\*\*,  $P < 0.0001$  by Mann-

932 Whitney test).

933 **c-d**, S9.6 dot blot analysis of a MCF10A (WT) and *A3B*-null (KO) genomic DNA dilution  
934 series +/- exogenous RNase H (RNH; representative images). Parallel dsDNA dot blots  
935 provided a loading control. Quantification normalized to the most concentrated WT  
936 signal ( $n \geq 4$ ; mean  $\pm$  SEM; \*,  $P < 0.05$  by two-tailed unpaired t-test).

937 **e-f**, IF images and quantification of U2OS shCtrl and shA3B cells stained with S9.6  
938 (green) and DAPI (blue). Diminution of nucleoplasmic S9.6 signal by exogenous RNase  
939 H (RNH) confirmed signal specificity (representative images; 5  $\mu$ m scale bar;  $n > 100$   
940 nuclei per condition; red bars represent mean  $\pm$  SEM; \*\*\*\*,  $P < 0.0001$  by Mann-Whitney  
941 test).

942 **g-h**, S9.6 dot blot analysis of a U2OS shCtrl and shA3B genomic DNA dilution series +/-  
943 exogenous RNase H (RNH; representative images). Parallel dsDNA dot blots provided  
944 a loading control. Quantification normalized to the most concentrated shCtrl signal ( $n \geq$   
945 4; mean  $\pm$  SEM; \*\*\*,  $P < 0.001$  by two-tailed unpaired t-test).

946 **i-j**, IF images and quantification of MCF10A (WT) and *A3B*-null (KO) cells stained with  
947 S9.6 (green), DAPI (blue), and  $\gamma$ -H2AX (representative images; 5  $\mu$ m scale bar;  $n > 100$   
948 nuclei per condition; red bars represent mean  $\pm$  SEM; \*\*\*\*,  $P < 0.0001$  by Mann-Whitney  
949 test, \*\*\*,  $P < 0.001$  by two-tailed unpaired t-test).

950 **k-l**, IF images and quantification of U2OS shCtrl and shA3B cells stained with S9.6  
951 (green), DAPI (blue), and  $\gamma$ -H2AX (representative images; 5  $\mu$ m scale bar;  $n > 100$   
952 nuclei per condition; red bars represent mean  $\pm$  SEM; \*\*\*\*,  $P < 0.0001$  by Mann-Whitney  
953 test, \*\*\*,  $P < 0.001$  by two-tailed unpaired t-test).

954

955 **Fig. 3. A3B overexpression reduces nuclear R-loop levels**

956 **a-d**, IF images (a and c) and quantification (b and d) of U2OS cells expressing the  
957 denoted eGFP construct (green) and stained with S9.6 (red) and DAPI (blue). Upper  
958 panel shows experimental workflow and lower panel representative images (5  $\mu$ m scale  
959 bar; n > 60 nuclei per condition; red bars represent mean  $\pm$  SEM; \*,  $P < 0.05$  and \*\*\*,  $P$   
960 < 0.001 by one-way ANOVA; ns, not significant).

961 **e**, Immunoblots of U2OS shCtrl or shA3B cells complemented with empty vector (EV),  
962 A3B-HA, or A3B-E255A-HA. The lower image shows the results of a DNA deaminase  
963 activity assay with extracts from the indicated cell lines (reaction quantification below  
964 with purified A3A as a positive control and reaction buffer as a negative control).

965 **f-g**, Dot blot analysis of U2OS shCtrl or shA3B cells complemented with empty vector  
966 (EV), A3B-HA, or A3B-E255A-HA. A genomic DNA dilution series +/- exogenous RNase  
967 H (RNH) was probed with either S9.6 antibody or dsDNA antibody as a loading control  
968 (representative images). Quantification normalized to the most concentrated shCtrl  
969 signal (n = 3; mean  $\pm$  SEM; \*,  $P < 0.05$  by two-tailed unpaired t-test; ns, not significant).

970

971 **Fig. 4. A3B-regulated R-loops are transcription-dependent**

972 **a-b**, IF images and quantification of U2OS shCtrl and shA3B cells treated with triptolide  
973 (1  $\mu$ M, 4 hrs) and subsequently stained with S9.6 (green) and DAPI (blue);  
974 representative images; 5  $\mu$ m scale bar; n > 130 nuclei per condition; red bars represent  
975 mean  $\pm$  SEM; \*\*\*,  $P < 0.001$  and \*\*\*\*,  $P < 0.0001$  by one-way ANOVA; ns, not  
976 significant).

977 **c-d**, S9.6 dot blot analysis of a genomic DNA dilution series +/- RNH from U2OS shCtrl

978 or shA3B cells treated with triptolide (TRP; 1  $\mu$ M, 4 hrs) or flavopiridol (FLV; 1  $\mu$ M, 1 hr;  
979 representative images). Parallel dsDNA dot blots provided a loading control.  
980 Quantification was normalized to the most concentrated shCtrl/DMSO signal (n = 3;  
981 mean  $\pm$  SEM; \*,  $P < 0.05$ ; \*\*,  $P < 0.01$  by two-tailed unpaired t-test).

982

### 983 **Fig. 5. A3B affects a large proportion of R-loops genome-wide**

984 **a-b**, Pie graphs representing R-loop distributions in wild-type (WT) and *A3B*-null (KO)  
985 MCF10A cells.

986 **c-e**, Meta-analysis of read density (FPKM) for DRIP-seq results from wild-type (WT,  
987 blue) and *A3B*-null MCF10A (KO, red) partitioned into 3 groups (increased, decreased,  
988 and unchanged) as described in the text. Input read densities are indicated by  
989 overlapping gray lines.

990 **f-g, h-i, j-k**, DRIP-seq profiles for representative genes in each of the groups defined in  
991 panel c-e. Independent quantification by DRIP-qPCR +/- RNase H (RNH) treatment  
992 (striped bars) is shown in the histogram to the right (n  $\geq$  4; means  $\pm$  SEM expressed as  
993 percentage of input; \*,  $P < 0.05$ ; \*\*,  $P < 0.01$ ; \*\*\*\*,  $P < 0.0001$  by two-tailed unpaired t-  
994 test; ns, not significant).

995

### 996 **Fig. 6. Kinetics of R-loop induction and resolution**

997 **a**, Schematic of the DRIP-seq workflow used for panels d-e.

998 **b**, RT-qPCR of *A3B* mRNA from MCF10A (WT) and *A3B*-null (KO) cells treated with  
999 PMA (25 ng/ml) for the indicated times. Values are expressed relative to the  
1000 housekeeping gene, *TBP* (n = 3; mean  $\pm$  SEM; knockout levels not detectable).



1001 **c**, Immunoblots of extracts from MCF10A (WT) and *A3B*-null (KO) cells treated with  
1002 PMA (25 ng/ml) for the indicated times and probed with indicated antibodies.

1003 **d**, DRIP-seq profiles for two PMA-responsive genes, *JUNB* and *DUSP1*, in DMSO or  
1004 PMA-treated MCF10A (WT; upper profiles) and *A3B*-null (KO; lower profiles).  
1005 Independent quantification by DRIP-qPCR +/- RNase H (RNH) treatment (striped bars)  
1006 is shown in the histogram to the right ( $n \geq 4$ ; mean  $\pm$  SEM normalized to DMSO WT; \*,  
1007  $P < 0.05$  and \*\*,  $P < 0.01$  by two-tailed unpaired t-test).

1008 **e**, DRIP-seq profiles for two PMA non-responsive genes, *GAPDH* and *HSPA8*, in  
1009 DMSO or PMA-treated MCF10A (WT; upper profiles) and *A3B*-null (KO; lower profiles).  
1010 Independent quantification by DRIP-qPCR +/- RNase H (RNH) treatment (striped bars)  
1011 is shown in the histogram to the right ( $n \geq 4$ ; mean  $\pm$  SEM normalized to DMSO WT; ns,  
1012 not significant). *HSPA8* levels decline in WT and KO cells after PMA treatment in a  
1013 manner that is independent of *A3B*.

1014 **f-g**, IF images and quantification of MCF10A (WT) and *A3B*-null (KO) cells treated with  
1015 PMA for the indicated times and stained with S9.6 (green) and DAPI (blue). Diminution  
1016 of nucleoplasmic S9.6 signal by exogenous RNase H (RNH) confirmed signal specificity  
1017 (representative images; 5  $\mu$ m scale bar;  $n > 100$  nuclei per condition; red bars represent  
1018 mean  $\pm$  SEM; \*\*,  $P < 0.01$  \*\*\*\*,  $P < 0.0001$  by Mann-Whitney test).

1019

## 1020 **Fig. 7. A3B biochemical activities required for R-loop resolution**

1021 **a**, Schematics of the nucleic acids used in biochemical experiments (5' fluorescent label  
1022 indicated by yellow star). The 15mer short ssDNA and short RNA were used in EMSAs

1023 in panels b and f, and the 62mer long ssDNA was used alone or as annealed to the  
1024 indicated complementary nucleic acids (black, DNA; red, RNA) in other experiments.

1025 **b**, Native EMSAs of A3B binding to fluorescently labeled short 15mer ssDNA or RNA in  
1026 the presence of increasing concentrations of otherwise identical unlabeled competitor.  
1027 The corresponding quantification shows the average fraction bound to substrate +/- SD  
1028 from 3 independent experiments.

1029 **c**, Substrates in panel a tested qualitatively for deamination by A3B. Negative (-) and  
1030 positive (+) controls are the long ssDNA alone and deaminated by recombinant A3A.

1031 **d**, A quantitative time course of A3B-catalyzed deamination of the long ssDNA vs an R-  
1032 loop (short) substrate (mean +/- SD of n = 3 independent experiments are shown with  
1033 most error bars smaller than the symbols).

1034 **e**, Subcellular localization of A3B-eGFP (WT), Mut1, and Mut2 in U2OS cells (scale bar  
1035 = 10  $\mu$ M).

1036 **f**, EMSAs comparing A3B WT and Mut2 binding to short 15mer ssDNA and RNA in the  
1037 presence of increasing concentrations of otherwise identical unlabeled competitor  
1038 ssDNA or RNA. The corresponding quantification shows the average fraction bound to  
1039 substrate +/- SD from 3 independent experiments.

1040 **g**, Quantitative comparison of A3B WT and Mut2 deamination of the long ssDNA versus  
1041 an R-loop (short) substrate. Representative gels are shown for the time-dependent  
1042 accumulation of product, along with quantitation of 3 independent experiments (mean  
1043 +/- SD with most error bars smaller than the symbols; for comparison the WT data are  
1044 the same as those in panel d).

1045 **h**, IF images and quantification of U2OS cells expressing the indicated eGFP construct

1046 (green) and stained with S9.6 (red) and DAPI (blue; 5  $\mu$ m scale bar; n > 60 nuclei per  
1047 condition; red bars represent mean  $\pm$  SEM; \*\*\*\*,  $P < 0.0001$  by one-way ANOVA; ns,  
1048 not significant).

1049

1050 **Fig. 8. R-Loop mutagenesis and *kataegis* by APOBEC3B**

1051 **a**, Cartoon of a working model for A3B-mediated R-loop resolution with and without  
1052 associated mutations. Other R-loop regulatory factors are depicted in shades of green  
1053 and blue. Transcription, splicing, and other RNA- and R-loop-associated complexes are  
1054 not shown for clarity.

1055 **b**, A dot plot showing the fraction of APOBEC3-attributed mutations (per Mbp per tumor)  
1056 in the indicated overexpressed gene groups (FC, fold-change in breast tumors relative  
1057 to the average observed in normal breast tissues). Pairwise comparisons are significant  
1058 for all combinations of the lowest 4 versus the highest 3 expression groups ( $P < 1 \times 10^{-12}$   
1059 by Welsh's t-test).

1060 **c**, Stacked bar graphs showing the proportion of each COSMIC mutation signature in  
1061 TCGA breast tumors with mutations in splice factor genes or not (n = 81 splice factor  
1062 mutated tumors; n = 841 for non-splice factor mutated tumors;  $P < 0.017$  by Fisher's  
1063 exact test). The APOBEC3 signature percentage (red) is comprised of COSMIC  
1064 signatures 2 and 13, and other signatures are shown in different shades of gray.

1065 **d**, Quantification of nucleoplasmic R-loop levels in U2OS cells expressing an empty  
1066 vector (EV) control or A3B following a 2 hr treatment with DMSO or the splicing inhibitor  
1067 Plad B (n > 50 nuclei per condition; red bars represent mean  $\pm$  SEM; \*\*\*\*,  $P < 0.0001$  by  
1068 two-tailed unpaired t-test).

1069 **e**, Distribution of the distances to the nearest SV of all non-clustered APOBEC3  
1070 mutations (gold), all *kataegic* mutation events (teal), and R-loop associated APOBEC3  
1071 *kataegic* mutations (red).

1072 **f-g**, Dot plot representations of short ( $\geq 3$ ) and long ( $\geq 5$ ) APOBEC3 *kataegic* tracts in  
1073 PCAWG breast tumor WGS. The x- and y-axis reports A3B-associated 5'-RTCA and  
1074 A3A-associated 5'-YTCA enrichments, respectively. Dashed lines indicate where non-  
1075 skewed distributions should cluster, red dots represent data from specimens with at  
1076 least one R-loop-associated *kataegic* event, and the gray ovals highlight the area in  
1077 which 5'-RTCA enrichments occur (Mann-Whitney U-test Q-values indicated in each  
1078 plot).

1079 **h**, Representative NTS *kataegic* events in the indicated genes. Wild-type trinucleotides  
1080 and mutational outcomes are indicated.

1081

**a**

| Protein Name | kDa | Accession | A3B AP-MS        |               |       | S9.6 AP-MS       |               |       |
|--------------|-----|-----------|------------------|---------------|-------|------------------|---------------|-------|
|              |     |           | Percent Coverage | Peptides ID'd |       | Percent Coverage | Peptides ID'd |       |
|              |     |           |                  | Unique        | Total |                  | Unique        | Total |
| APOBEC3B     | 46  | Q9UJ17    | 59.7             | 21            | 119   | 11.5             | 5             | 5     |
| RBM8A        | 20  | Q9Y5S9    | 40.2             | 6             | 20    | 31.0             | 4             | 4     |
| SRSF10       | 31  | O75494    | 31.7             | 9             | 28    | 24.0             | 9             | 9     |
| MAP4         | 121 | P27816    | 31.6             | 26            | 35    | 7.20             | 6             | 6     |
| SF3B2        | 100 | Q13435    | 30.8             | 27            | 47    | 10.5             | 8             | 8     |
| HNRNPUL1     | 96  | Q9BUJ2    | 30.5             | 31            | 79    | 21.4             | 16            | 16    |
| SRSF7        | 27  | Q16629    | 29.4             | 9             | 23    | 35.3             | 9             | 10    |
| SNRNP200     | 244 | O75643    | 24.1             | 40            | 51    | 17.9             | 30            | 30    |
| MMTAG2       | 29  | Q9BU76    | 24.0             | 5             | 11    | 34.6             | 7             | 7     |
| RCC2         | 56  | Q9P258    | 23.0             | 11            | 19    | 13.0             | 6             | 6     |
| HNRNPH2      | 49  | P55795    | 22.3             | 9             | 35    | 36.7             | 5             | 13    |
| SKIV2L2      | 118 | P42285    | 22.2             | 23            | 52    | 9.60             | 8             | 8     |
| ZFR          | 117 | Q96KR1    | 18.3             | 13            | 30    | 34.6             | 25            | 25    |
| SAFB         | 103 | Q15424    | 14.8             | 11            | 31    | 32.3             | 15            | 29    |
| MOV10        | 114 | Q9HCE1    | 11.2             | 11            | 19    | 29.6             | 22            | 22    |

**b**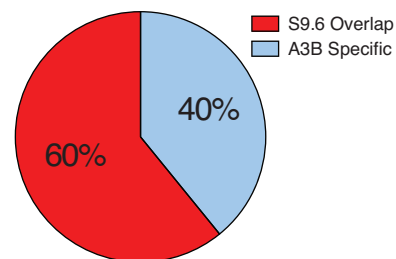**c**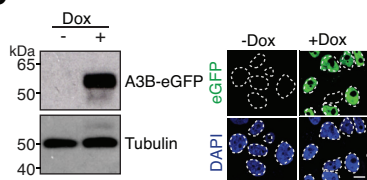**d**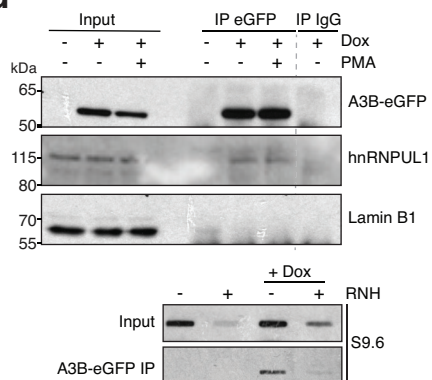**e**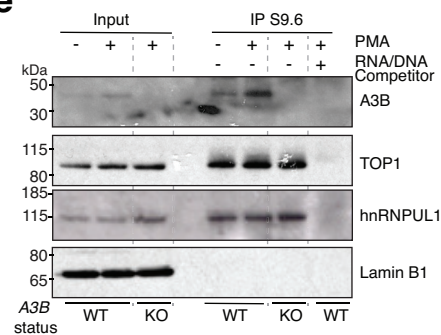**Figure 1**

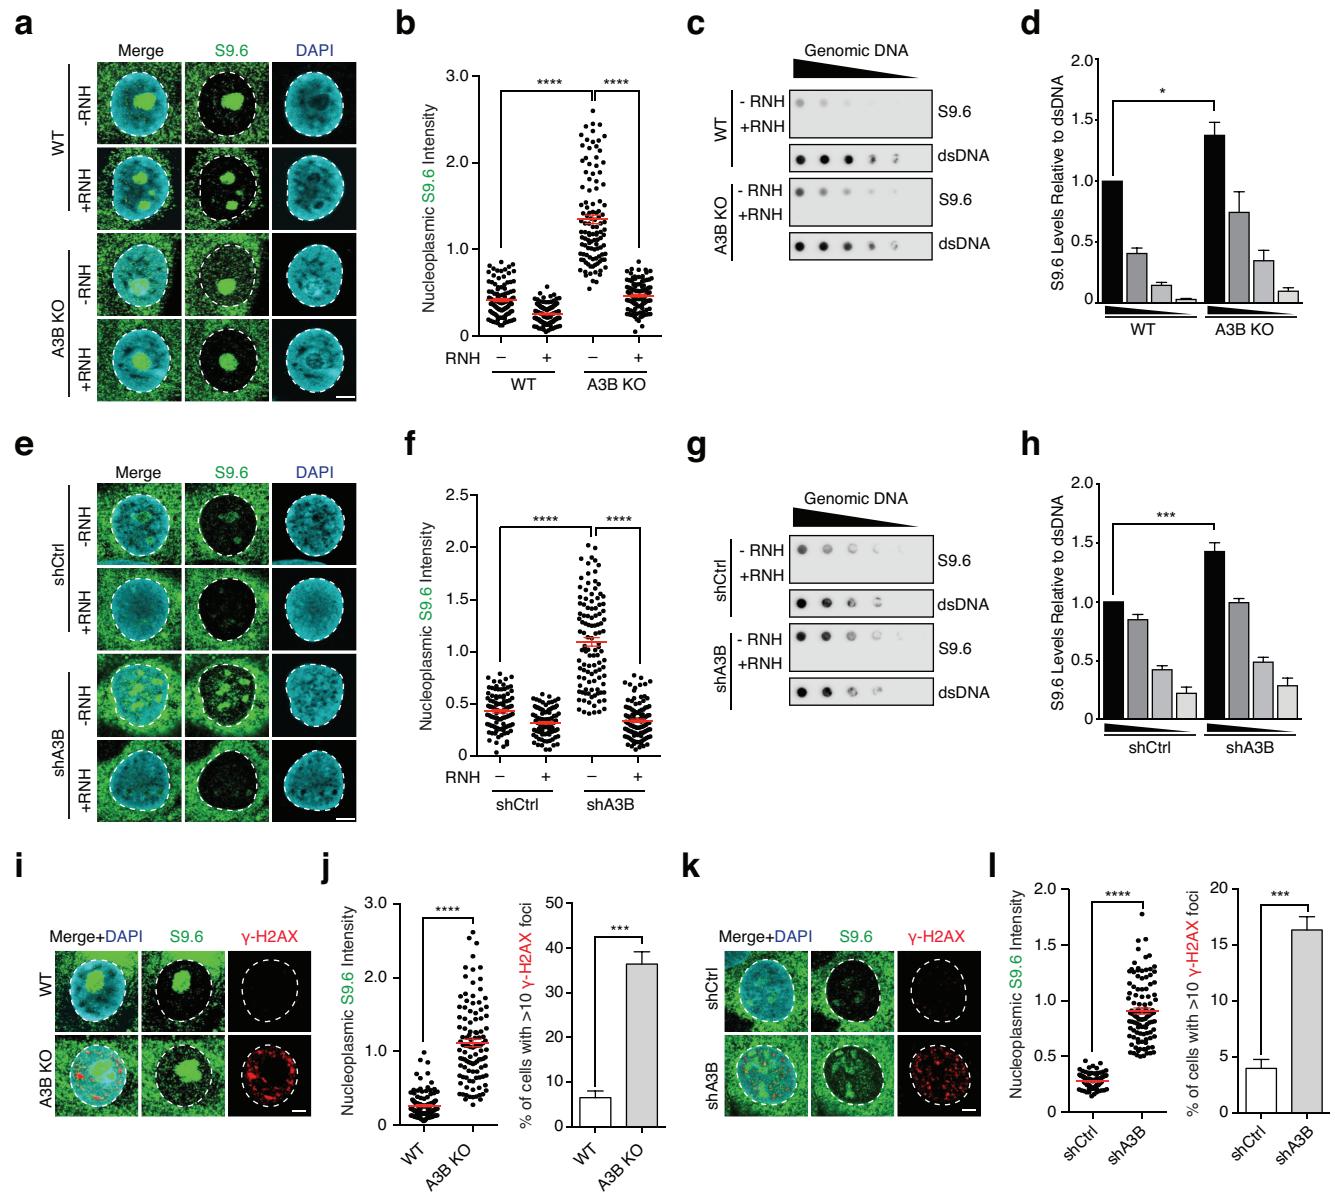

**Figure 2**

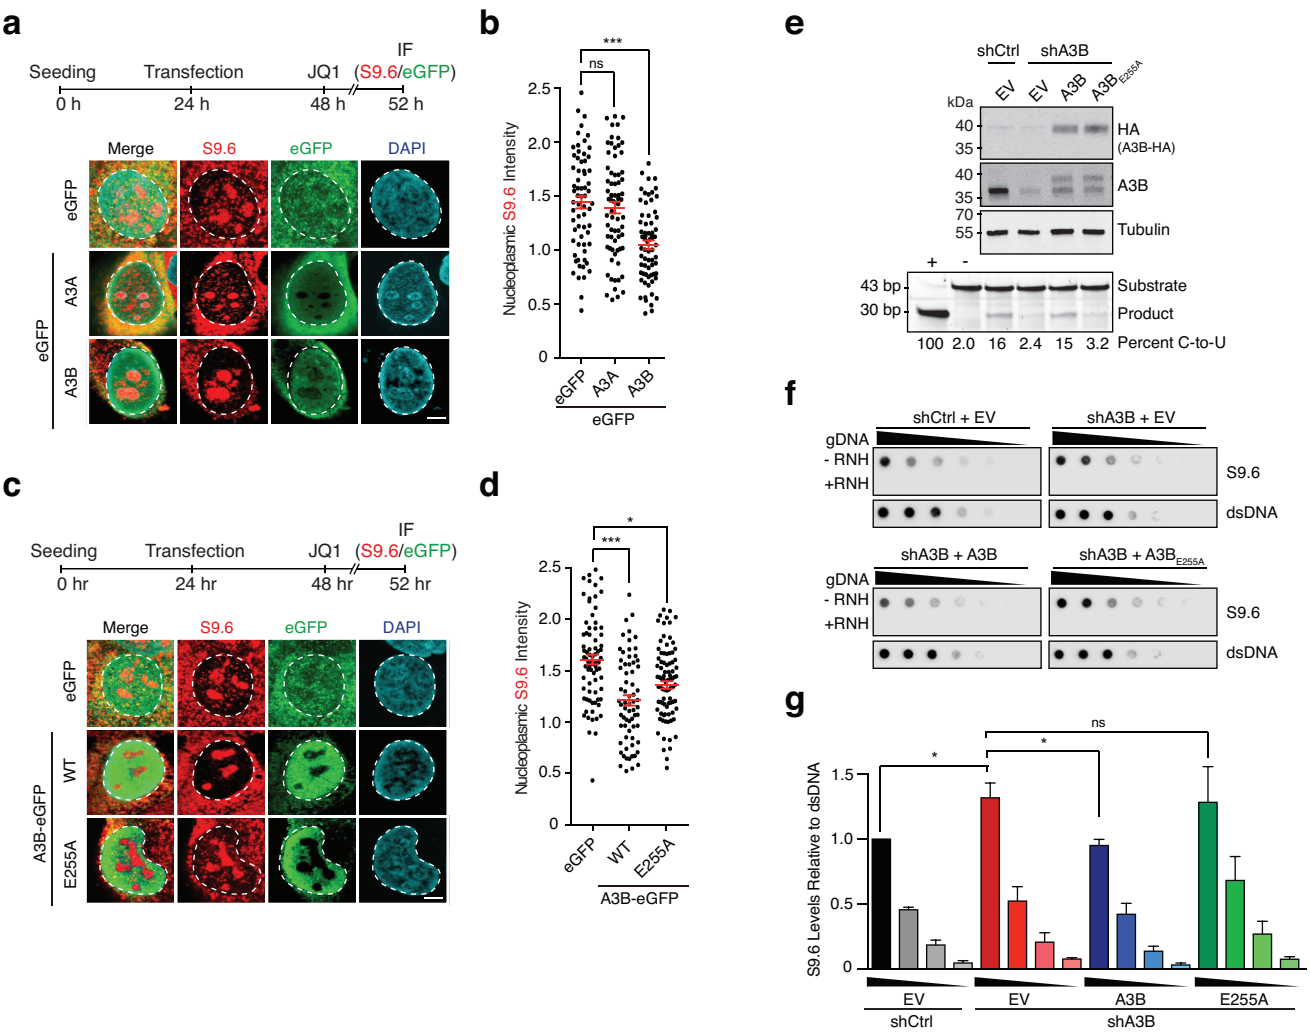

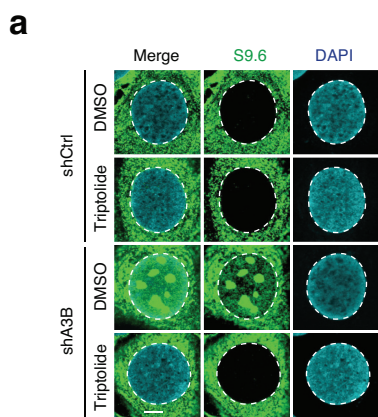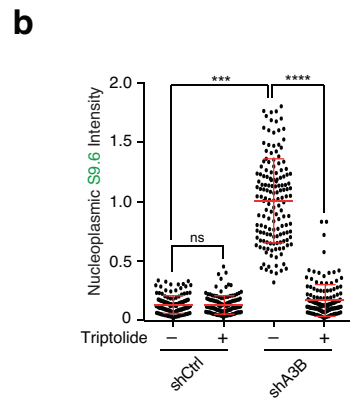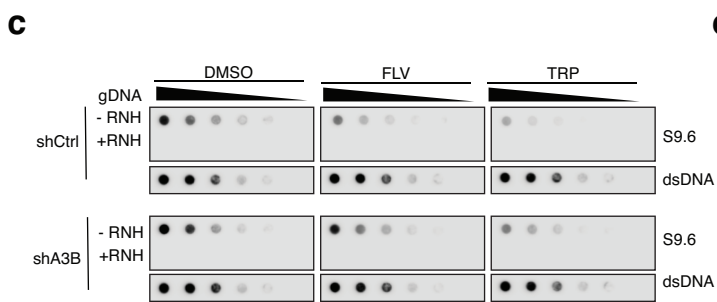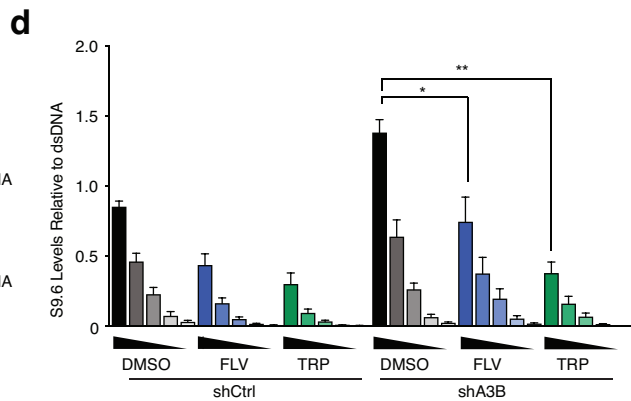

**Figure 4**



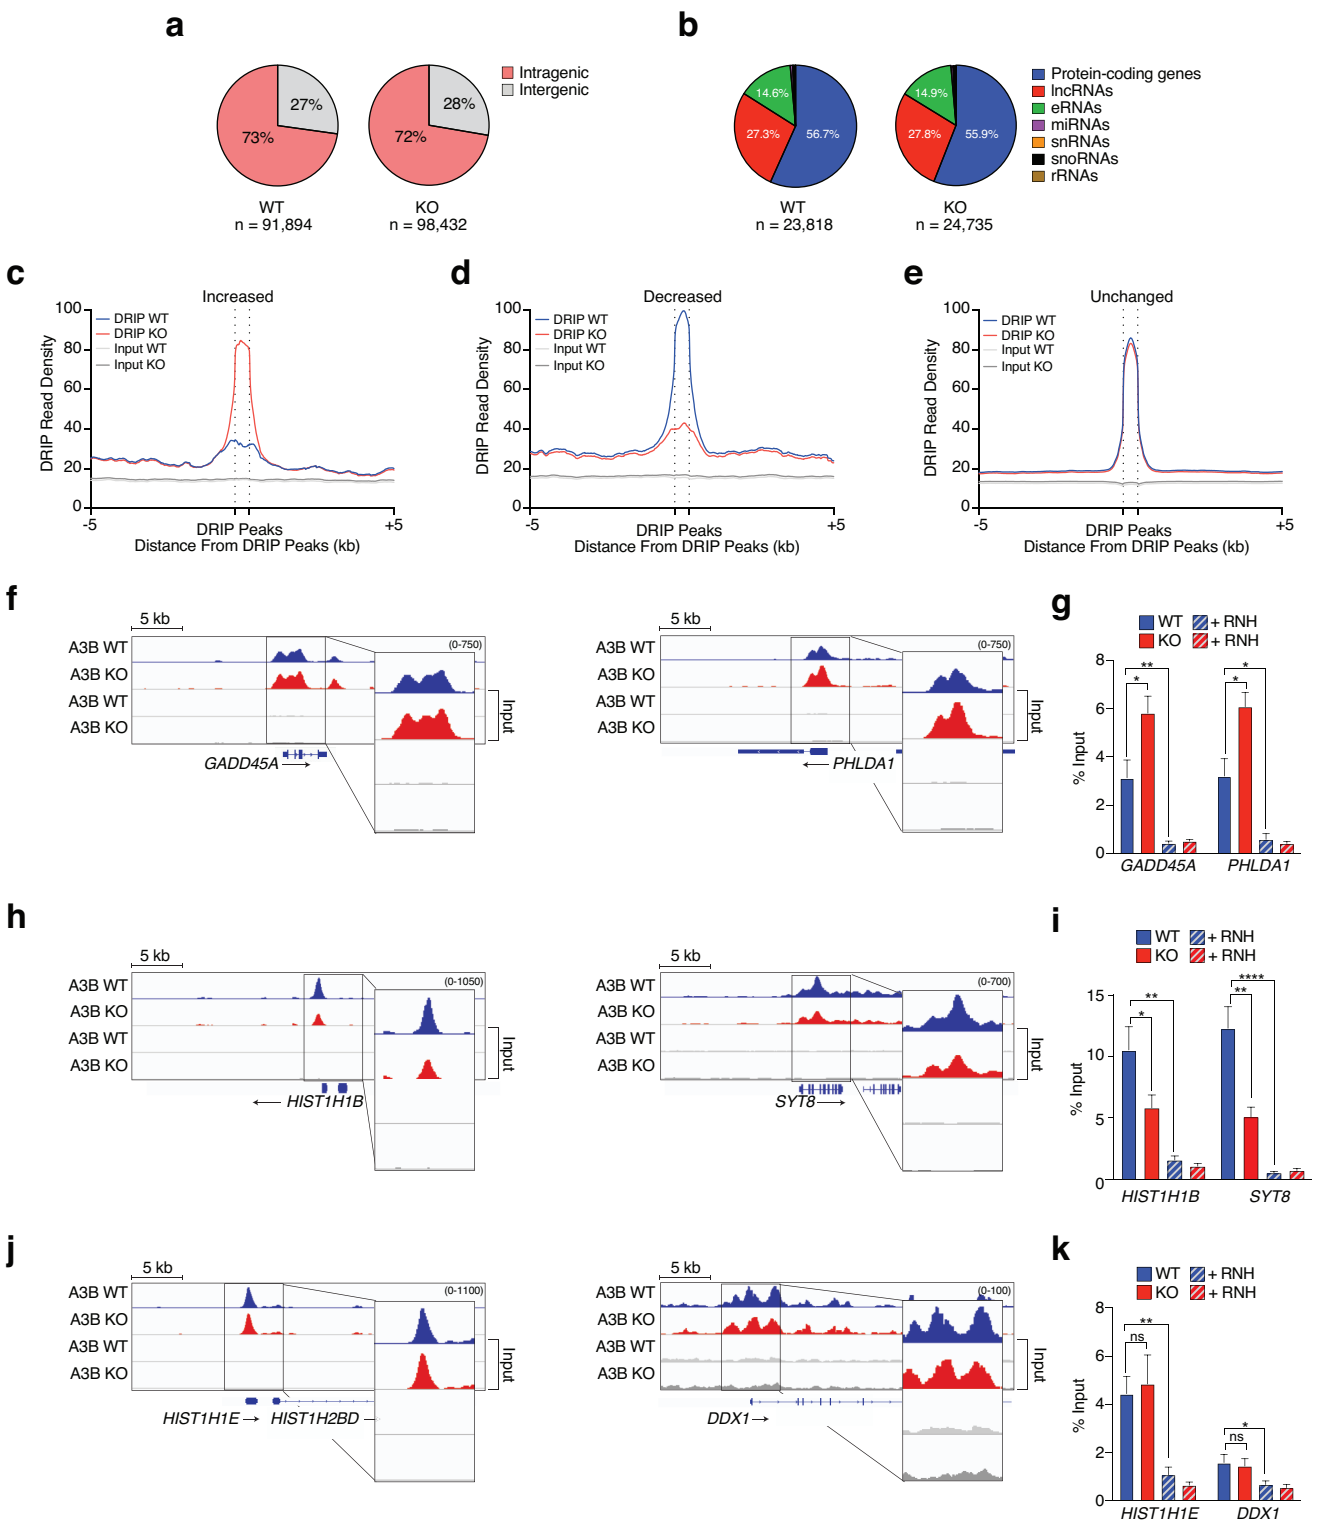

**Figure 5**

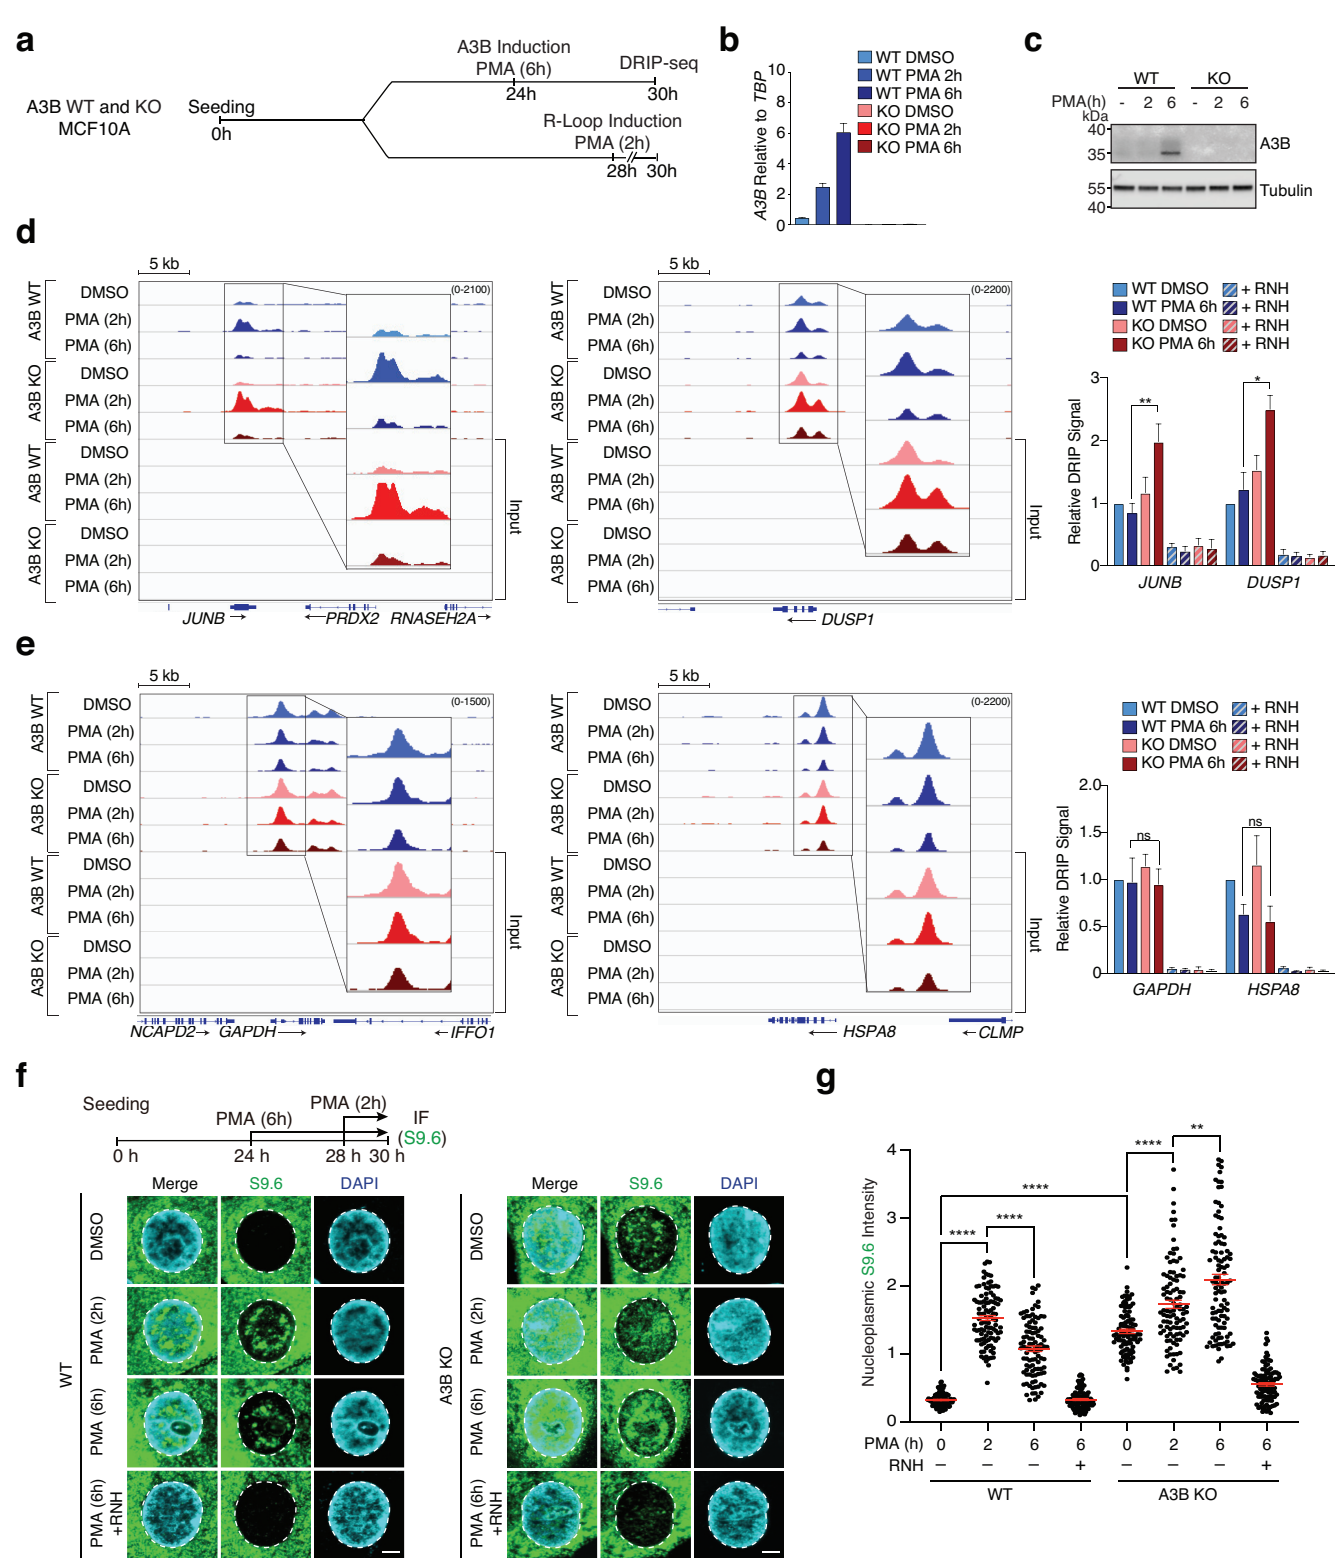

**Figure 6**

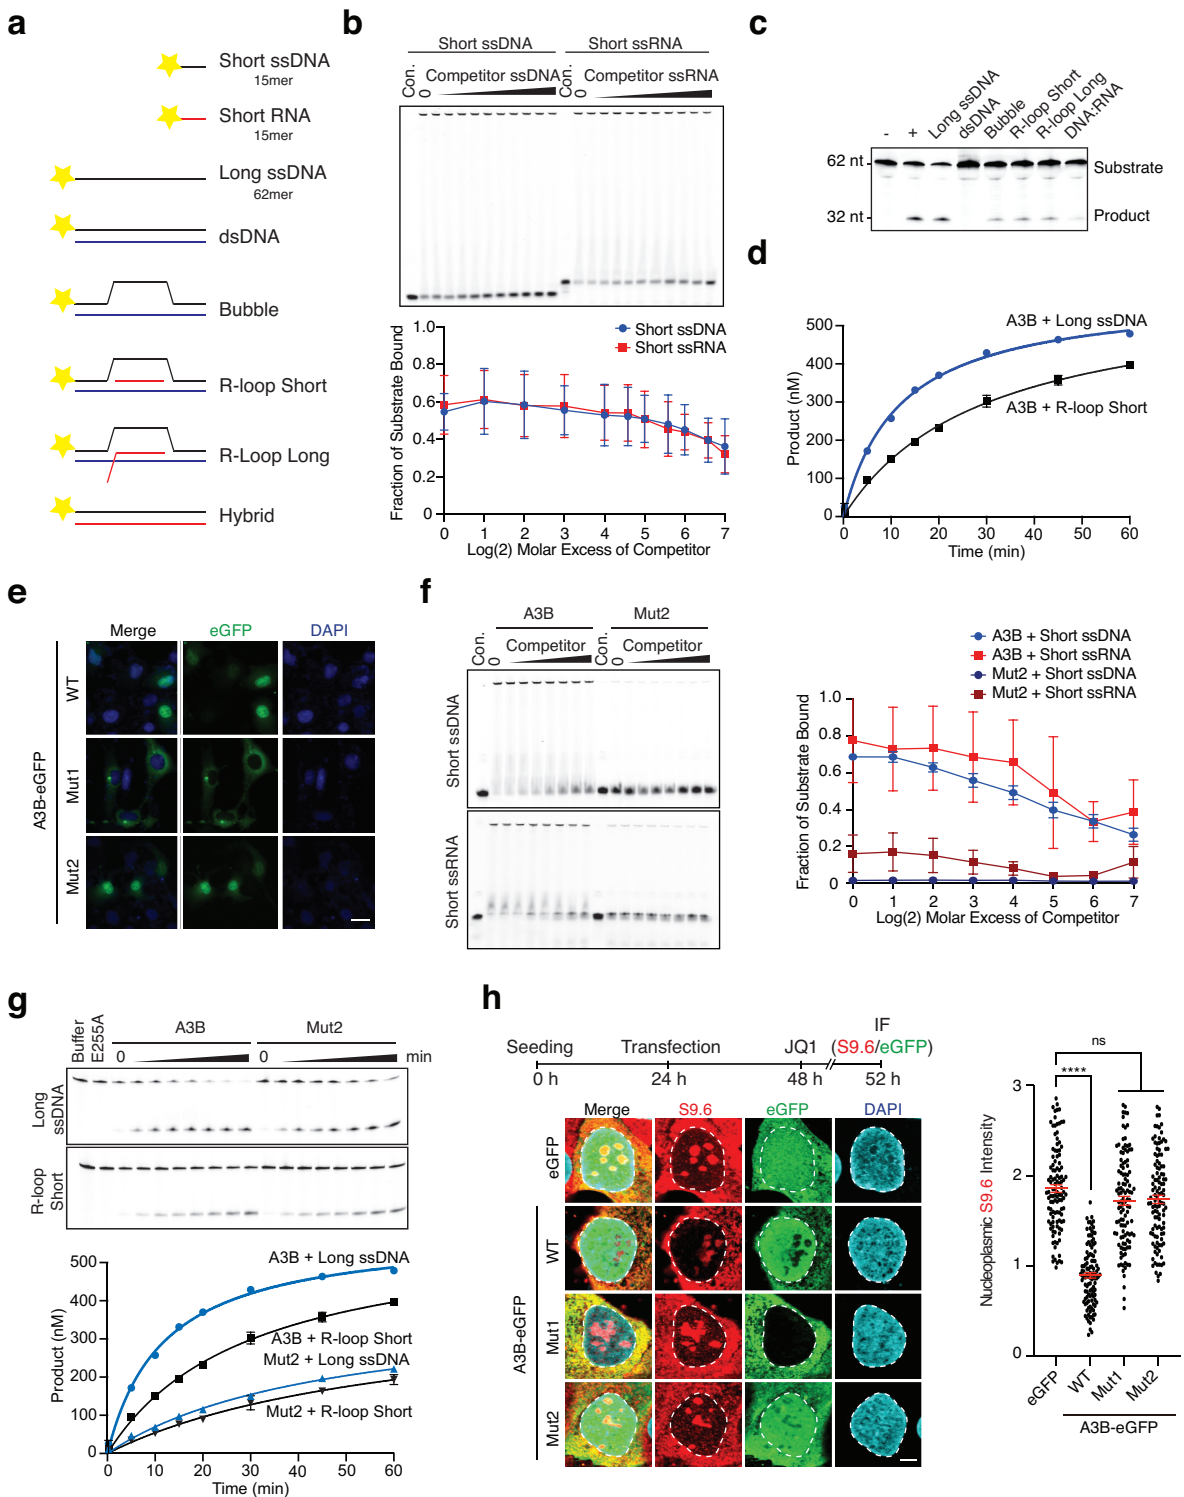

**Figure 7**
